1  
2  
3  
4  
5  
6  
7  
8  
9  
10  
11  
12  
13  
14  
15  
16  
17  
18  
19  
20  
21  
22  
23

Enhanced replication of mouse adenovirus type 1 following virus-induced degradation of protein kinase R (PKR)

Running Title: MAV-1 degrades PKR during infection

Danielle E. Goodman<sup>1,2</sup>, Carla D. Pretto<sup>1</sup>, Tomas A. Krepostman<sup>1</sup>, Kelly E. Carnahan<sup>1</sup> and Katherine R. Spindler\*<sup>1,2</sup>

<sup>1</sup>Department of Microbiology and Immunology, University of Michigan, Ann Arbor, USA

<sup>2</sup>Cellular and Molecular Biology Program

\*Corresponding author. Mailing address: Department of Microbiology and Immunology, University of Michigan Medical School, 1150 W. Medical Center Dr., 6724 Medical Science Bldg. II, Ann Arbor, MI 48109-5620

Phone (734) 615-2727

Fax: (734) 764-3562

Email: [krspin@umich.edu](mailto:krspin@umich.edu)

Total word count without references: 7251

Total word count without materials and methods or references: 5078

Abstract word count: 225

Importance word count: 144

## 24 **Abstract**

25 Protein kinase R (PKR) plays a major role in activating host immunity during infection  
26 by sensing dsRNA produced by viruses. Once activated by dsRNA, PKR phosphorylates the  
27 translation factor eIF2 $\alpha$ , halting cellular translation. Many viruses have methods of inhibiting  
28 PKR activation or its downstream effects, circumventing protein synthesis shutdown. These  
29 include sequestering dsRNA or producing proteins that bind to and inhibit PKR activation. Here  
30 we describe our finding that in multiple cell types, PKR was depleted during mouse adenovirus  
31 type 1 (MAV-1) infection. MAV-1 did not appear to be targeting PKR at a transcriptional or  
32 translational level because total PKR mRNA levels and levels of PKR mRNA bound to  
33 polysomes were unchanged or increased during MAV-1 infection. However, inhibiting the  
34 proteasome reduced the PKR depletion seen in MAV-1-infected cells, whereas inhibiting the  
35 lysosome had no effect. This suggests that proteasomal degradation alone is responsible for PKR  
36 degradation during MAV-1 infection. Time course experiments indicate that the degradation  
37 occurs early after infection. Infecting cells with UV-inactivated virus prevented PKR  
38 degradation, whereas inhibiting viral DNA replication did not. Together these results suggest that  
39 an early viral gene is responsible. Degradation of PKR is a rare mechanism to oppose PKR  
40 activity, and it has only been described in six RNA viruses. To our knowledge, this is the first  
41 example of a DNA virus counteracting PKR by degrading it.

42

## 43 **Importance**

44 The first line of defense in cells during viral infection is the innate immune system, which  
45 is activated by different viral products. PKR is a part of this innate immune system and is  
46 induced by interferon and activated by dsRNA produced by DNA and RNA viruses. PKR is such

47 an important part of the antiviral response that many viral families have gene products to  
48 counteract its activation or the resulting effects of its activity. Although a few RNA viruses  
49 degrade PKR, this method of counteracting PKR has not been reported for any DNA viruses.  
50 MAV-1 does not encode virus-associated RNAs, a human adenoviral defense against PKR  
51 activation. Instead, MAV-1 degrades PKR, and it is the first DNA virus reported to do so. The  
52 innate immune evasion by PKR degradation is a previously unidentified way for a DNA virus to  
53 circumvent the host antiviral response.

54

## 55 **Introduction**

56 Activation of protein kinase R (PKR) is a major innate immune response to viral  
57 infection. PKR is an interferon (IFN)-induced protein that is comprised of two major domains, an  
58 N-terminal double-stranded RNA binding domain and a C-terminal serine/threonine kinase  
59 domain (1, 2). PKR binds to dsRNA (3-5) and once bound, it becomes activated by dimerizing  
60 and autophosphorylating (6-9). When activated, PKR phosphorylates eukaryotic translation  
61 initiation factor 2 $\alpha$  (eIF2 $\alpha$ ), causing inhibition of protein synthesis and reduced viral replication  
62 (10-13). Many viruses encode gene products that block PKR activation or inhibit its ability to  
63 phosphorylate eIF2 $\alpha$  (14). A common mechanism is to produce a viral protein that binds and  
64 sequesters dsRNA, blocking its interaction with PKR. Examples of this are vaccinia virus E3L  
65 (15-17), influenza virus NS1 (18, 19), and Ebola virus protein VP35 (20). Other viruses produce  
66 proteins or RNA that bind directly to PKR to inhibit its activation, such as herpes simplex virus  
67 US11 (21, 22), HIV-1 Tat protein (23, 24) or TAR RNA (25), and human adenovirus (hAd)  
68 virus-associated (VA) RNAs (10, 26-28).

69

70 Degradation of PKR by viruses is a less documented method of regulating PKR. To date  
71 PKR degradation has been reported in six RNA viruses: Toscana virus (TOSV) (29), Rift Valley  
72 fever virus (RVFV) (30-32), poliovirus (33, 34), foot-and-mouth disease virus (FMDV) (35, 36),  
73 encephalomyocarditis virus (EMCV, strain mengovirus) (37, 38), and enterovirus 71 (39). RVFV  
74 and TOSV both degrade PKR via proteasomal mechanisms involving a viral nonstructural  
75 protein (NSs) (32, 40, 41). RVFV NSs recruits a SCF (SKP1-CUL1-F-box)<sup>FBXW11</sup> E3 ubiquitin  
76 ligase to ubiquitinate PKR and target it to the proteasome, though PKR ubiquitination could not  
77 be demonstrated (32, 41). The mechanism for PKR proteasomal degradation by NSs has not been  
78 described for TOSV (40). FMDV uses the other major cellular protein degradation pathway, the  
79 lysosome, to degrade PKR during infection (36). Though the mechanism is unclear, expression  
80 of the major FMDV protease 3C<sup>pro</sup> is required for PKR degradation by the lysosome. However,  
81 3C<sup>pro</sup> does not interact with PKR, nor is its protease activity required for PKR degradation. The  
82 enterovirus A71 3C<sup>pro</sup> causes PKR degradation by direct interaction (39). The mechanism of  
83 PKR depletion by poliovirus is unclear, though gene expression is required, and the major  
84 poliovirus proteases (2A and 3C) are not directly involved (33). The mechanism by which  
85 mengovirus depletes PKR during infection is unknown (37, 38).

86

87 Adenoviruses are species-specific, making the study of hAd pathogenesis difficult in an  
88 animal model. MAV-1 is a useful alternative to study adenovirus pathogenesis (42-46). MAV-1  
89 has molecular, genetic, and pathogenic similarities and differences to hAd. Their genomic  
90 structures are similar at a gross level, and both contain early genes involved in pathogenesis and  
91 immune evasion. Pathogenically, their tropisms vary, with hAd infecting epithelial cells, leading  
92 to upper respiratory and GI tract infections, and conjunctivitis, while MAV-1 infects endothelial

93 cells and monocytes, causing encephalitis and myocarditis. We and others have been  
94 investigating the adaptive and innate immune responses to MAV-1.

95

96 Human adenovirus VA RNAs bind PKR as a monomer, preventing its  
97 transautophosphorylation (47). However, MAV-1 does not produce VA RNAs (48), and it is not  
98 known whether MAV-1 induces PKR activation. In our studies of MAV-1 pathogenesis and the  
99 innate response, we discovered that during MAV-1 infection, PKR was depleted from cells as  
100 early as 12 hours post infection (hpi). Total PKR mRNA levels and PKR mRNA bound to  
101 polysomes were unchanged or increased during MAV-1 infection, suggesting that MAV-1 did  
102 not appear to be targeting PKR at a transcriptional or translational level. However, inhibiting the  
103 proteasome blocked the PKR depletion seen in MAV-1-infected cells, indicating that  
104 proteasomal degradation is responsible for PKR depletion during MAV-1 infection. We report  
105 results indicating that an early viral gene is likely responsible for mediating PKR degradation. To  
106 our knowledge, this is the first example of a DNA virus counteracting PKR by degrading it.

107

## 108 **Results**

109

### 110 **Viral DNA yield is increased in PKR<sup>-/-</sup> mouse embryonic fibroblasts.**

111 While PKR is an important part of the innate immune response, PKR<sup>-/-</sup> cells in culture are  
112 not always more susceptible to viral infection than wild type cells (49-51). PKR<sup>-/-</sup> mouse  
113 embryonic fibroblasts (MEFs) show increased viral yields compared to wild type MEFs when  
114 infected with vesicular stomatitis virus and influenza A (49, 50), but there is no change in viral  
115 yield during vaccinia virus infection compared to wild type cells (51). However, it was later

116 discovered that the PKR<sup>-/-</sup> MEF lines used are not complete PKR knockouts (52). There are two  
117 categories of PKR<sup>-/-</sup> MEFs derived from knockout mice: N-PKR<sup>-/-</sup> MEFs and C-PKR<sup>-/-</sup> MEFs  
118 (52). The PKR<sup>-/-</sup> MEFs derived from mice created in the Weissmann lab (53) are designated N-  
119 PKR<sup>-/-</sup> MEFs, because the C-terminal fragment of PKR is still expressed and can be detected by  
120 immunoblot when there is IFN induction (52). The fragment has the kinase catalytic activity of  
121 PKR, but it does not bind dsRNA (52). The PKR<sup>-/-</sup> MEFs derived from mice created in the Bell  
122 lab (54) are designated as C-PKR<sup>-/-</sup> MEFs, because the N-terminal fragment of PKR is still  
123 expressed and can be detected by immunoblot with specific PKR antibodies (52). The fragment  
124 is catalytically inactive, but it can still bind dsRNA (52). Susceptibility of these PKR<sup>-/-</sup> MEFs to  
125 specific viruses may be dependent on the PKR mutation and the mechanism used by each virus  
126 to circumvent PKR.

127

128 To determine whether PKR plays an important role during MAV-1 infection, we tested  
129 the susceptibility of both PKR<sup>-/-</sup> MEF lines to MAV-1 infection. We infected wild type MEFs,  
130 N-PKR<sup>-/-</sup> MEFs, and C-PKR<sup>-/-</sup> MEFs with MAV-1 at an MOI of 1 PFU/cell and collected cell  
131 pellets at 48 and 72 hpi. DNA was purified from the cell pellets and analyzed for MAV-1  
132 genome copies by qPCR. N-PKR<sup>-/-</sup> MEFs produced a significantly higher viral DNA yield than  
133 wild type MEFs at 48 hpi, and both PKR mutant MEF lines had a significantly higher viral DNA  
134 yield than wild type MEFs at 72 hpi (Fig. 1). Although we have not confirmed the production of  
135 truncated PKR proteins in the cells in our laboratory, the results of Fig. 1 indicate that PKR  
136 activation is an important antiviral response during MAV-1 infection *in vitro*.

137

138 **Mouse PKR is depleted during MAV-1 infection.**

139 To determine whether MAV-1 affects PKR during infection, we infected several cell  
140 types and analyzed PKR protein expression. We infected immortalized C57BL/6 MEFs,  
141 C57BL/6 primary peritoneal macrophages, and CMT93 cells (mouse rectal carcinoma cells) with  
142 MAV-1 at an MOI of 10 and collected cell lysates 24, 48, and 72 hpi. We analyzed cell lysates  
143 for the presence of PKR by immunoblot using a polyclonal antibody that detects mouse PKR.  
144 We probed blots with antibodies to actin as a loading control. To our surprise, in C57BL/6  
145 MEFs, PKR was almost completely depleted from lysates 24 hpi and remained depleted through  
146 72 hpi (Fig. 2A and B). PKR was also depleted compared to mock infection at 24 and 48 hpi in  
147 C57BL/6 MEFs infected at MOI 2 and 5 (Fig. S1). We also observed depletion of PKR in other  
148 cell types. In CMT93 cells, PKR was nearly undetectable at 24 hpi (Fig. 2A). In C57BL/6  
149 primary peritoneal macrophages, PKR was decreased at 48 hpi compared to mock lysates, and  
150 absent in infected lysates at 72 hpi (Fig. 2A). This indicates that MAV-1 causes PKR depletion  
151 during infection.

152  
153 To determine whether kinase activity of PKR is important for the depletion, we assayed  
154 infection of MEFs expressing a mutant form of mouse PKR with a point mutation in the kinase  
155 domain (K271R) (55). These cells, designated K271R SV40-MEFs, showed an even more rapid  
156 depletion of PKR than in WT SV40-MEFs (Fig. 2C). At 24 hpi, in K271R SV40-MEFs, 28% of  
157 PKR remained, compared to 60% in the WT SV40-MEFs. The fraction remaining at 72 hpi in  
158 K271R SV40-MEFs was 10%, compared to 30% in WT SV40-MEFs (Fig. 2C). This indicates  
159 that the PKR kinase does not have to be functional to be depleted during MAV-1 infection. Also,  
160 comparing the PKR immunoblot bands in the mock-infected WT SV40 MEFs and mutant

161 K271R SV40-MEFs suggests that the upper band of the PKR doublet usually seen in wild-type  
162 cells is a phospho-PKR band, because only the lower band of the PKR doublet is seen in kinase-  
163 dead mutant K271R SV40-MEFs. The data in Fig. 2A and C thus indicate that both PKR and  
164 phospho-PKR are depleted during MAV-1 infection.

165

### 166 **MAV-1 does not cause PKR depletion by reducing steady-state levels of PKR mRNA**

167 To determine the mechanism of PKR depletion, we first assayed whether reduction in  
168 PKR protein during MAV-1 infection was due to reduced PKR mRNA steady-state levels. We  
169 mock-infected or infected C57BL/6 MEFs and primary peritoneal macrophages at an MOI of 10  
170 and collected cell lysates at 24, 48, and 72 hpi. We synthesized cDNA from RNA purified from  
171 these cell lysates and assayed for PKR mRNA by qPCR. In C57BL/6 MEFs, PKR mRNA levels  
172 were similar between mock and infected lysates at 24 hpi (Fig. 3A), a time point in which PKR  
173 protein levels were already greatly depleted in the infected lysates compared to mock lysates  
174 (Fig. 2). Although PKR mRNA levels were depleted 33% at 48 hpi and 40% 72 hpi in MAV-1-  
175 infected lysates compared to mock lysates, this does not correlate to the 84% and 94% reduction,  
176 respectively, in PKR protein levels at those time points (Fig. 2B). In C57BL/6 primary peritoneal  
177 macrophages, PKR mRNA levels in the infected lysates were 2-3 times higher than levels in  
178 mock lysates at all three time points assayed (Fig. 3B), even though PKR protein levels were  
179 almost completely depleted in infected lysates at 72 hpi (Fig. 2). This is evidence that MAV-1 is  
180 not causing PKR protein depletion by reducing PKR steady-state mRNA levels during infection.

181

182

183



## 184 **MAV-1 infection effects on PKR translation**

185           Because MAV-1 did not reduce PKR mRNA steady-state levels, we determined whether  
186 MAV-1 causes PKR depletion by reducing translation of its mRNA. We first assayed total PKR  
187 mRNA bound to ribosomes during infection. C57BL/6 MEFs were mock infected or infected at  
188 an MOI of 5, and lysates were collected at 48 hpi in the presence of cycloheximide to keep the  
189 mRNA bound to the ribosomes (56). Lysates were centrifuged through 25% sucrose to pellet  
190 ribosomes, and RNA was purified from the pellets. The purified RNAs were used to generate  
191 cDNA, which we assayed for PKR mRNA by qPCR. As a control for pelleting of ribosomes, we  
192 assayed the pellets and sucrose cushion supernatants by immunoblot with antibodies to  
193 ribosomal protein RPL7. We confirmed that RPL7 was only present in the pellets and not the  
194 supernatants (Fig. S2). There was no significant difference between the amount of PKR mRNA  
195 in the ribosome pellet of mock infected lysates compared to MAV-1-infected lysates (Fig. 4A).

196

197           To confirm the results seen in total mRNA bound to ribosomes, we also centrifuged cell  
198 extracts on sucrose gradients to generate polysome profiles. This enabled us to analyze levels of  
199 PKR mRNA associated with actively-translating ribosomes during infection. C57BL/6 MEFs  
200 were mock infected or infected at an MOI of 2, and lysates were collected at 24 hpi in the  
201 presence of cycloheximide, as above. RNA content for mock and infected lysates was estimated  
202 by NanoDrop spectrophotometry, and equivalent OD amounts of RNA were centrifuged on 10-  
203 50% sucrose gradients to sediment 40S and 60S ribosomal subunits, 80S ribosomes  
204 (monosomes), and polyribosomes (polysomes). A typical polysome profile was obtained (Fig.  
205 4B). RNA was purified from fractions containing monosomes and polysomes and then used to  
206 generate cDNA, which we assayed for PKR mRNA by qPCR (Fig. 4C). As a control, GAPDH

207 mRNA was measured by qPCR, and PKR mRNA levels in each fraction were normalized to the  
208 GAPDH mRNA content. When the data for percentage of PKR mRNA bound to ribosomes was  
209 pooled into monosome and polysome fractions and analyzed (Fig. 4D), 90.1% and 91.8% were  
210 bound to polysomes (fractions 7-19) for mock and infected samples, respectively, compared to  
211 9.9% and 8.2% bound to monosomes (fractions 1-6). We performed two additional polysome  
212 gradient analyses. The pooled data from all three (Fig. 4E) were similar to the data for Fig. 4D,  
213 i.e., 82.7% and 92.7% of PKR mRNA were bound to mock and infected polysomes, respectively,  
214 compared to 17.3% and 7.3% bound to monosomes. Thus, PKR protein depletion during MAV-1  
215 infection does not appear to stem from a decrease in PKR mRNA translation.

216

217 We also assayed whether PKR mRNA might have a signal that would reduce its  
218 translation during MAV-1 infection. We constructed a plasmid that positioned sequence  
219 corresponding to the 5' UTR of PKR mRNA upstream of a reporter nanoluciferase gene (57),  
220 transfected it into C57BL/6 MEFs, then infected with MAV-1. Compared to cells transfected  
221 with a control plasmid with the human  $\beta$ -globin 5' UTR upstream of the reporter nanoluciferase,  
222 there was no significant difference in luciferase activity between mock infected and infected  
223 samples (Fig. S3). These data suggest that MAV-1 is not affecting PKR translation through  
224 interaction with the 5' UTR of PKR. The data are consistent with the ribosome pellet and  
225 polysome data that MAV-1 infection does not reduce PKR mRNA translation.

226

### 227 **PKR is depleted by proteasomal degradation during MAV-1 infection.**

228 There are two main proteolysis pathways in cells, proteasomal degradation and lysosomal  
229 degradation (58). To determine whether MAV-1 depletes PKR by either protein degradation

230 pathway, we first assayed whether PKR is lysosomally degraded as follows. CMT93 cells were  
231 mock infected or infected with MAV-1 and treated at the time of infection with the lysosome  
232 inhibitors ammonium chloride or chloroquine, or water (as a control). At 24 hpi, we collected  
233 lysates and analyzed them by immunoblot with antibodies to PKR. In the presence of the  
234 lysosomal degradation inhibitors, PKR was depleted by 24 hpi (Fig. 5A), indicating that  
235 lysosomal degradation was not the cause of PKR depletion during MAV-1 infection. We  
236 confirmed that the inhibitor treatment did block lysosomal degradation by incubating cells with  
237 dye-quenched bovine serum albumin (DQ BSA) in addition to the lysosomal inhibitors. DQ BSA  
238 is self-quenched until it is digested in the lysosome (59, 60), and imaging confirmed that cells  
239 treated with lysosome inhibitors did not fluoresce, but cells treated with the vehicle control  
240 (H<sub>2</sub>O) did, as expected (Fig. 5B).

241

242 Next, we examined whether proteasomal degradation is responsible for the degradation of  
243 PKR by using proteasome inhibitors MG132 and bortezomib. These inhibit proteasome activity  
244 by binding to the active sites in the 20S subunit and blocking the proteolytic activity (61-63). We  
245 mock infected or infected C57BL/6 MEFs with MAV-1 and treated with MG132 or bortezomib  
246 in DMSO at the time of infection. At 24 hpi, we collected lysates and analyzed them by  
247 immunoblot for PKR protein levels. While PKR was depleted in the control DMSO-treated  
248 MAV-1-infected cells as expected, PKR protein was present in the MG132- and bortezomib-  
249 treated cells at levels comparable to mock infected cells (Fig. 6A and B). To rule out the  
250 possibility that PKR was present (not depleted) because the virus infection itself was inhibited by  
251 MG132 or bortezomib, we assayed viral replication of MAV-1 with MG132 and bortezomib  
252 treatment by qPCR of viral DNA. Viral replication was equivalent in all three treatment groups

253 (Fig. S4), indicating that the treatments did not affect the ability of the virus to productively  
254 infect the cells. Taken together, these data indicate that MAV-1 infection results in PKR  
255 depletion by causing PKR to be degraded by the proteasome during infection.

256

257 A signal for proteasomal degradation is the conjugation of ubiquitin to a protein (64, 65).

258 We examined whether PKR is ubiquitinated by immunoblot. We detected ubiquitination of a  
259 positive control, mouse p53, which is degraded in the presence of MAV-1 proteins (66).

260 However, even with the use of epitope-tagged ubiquitin (67) and MG132 treatment, we were  
261 unable to detect PKR ubiquitination during infection (Fig. S5). This is consistent with an  
262 inability to detect PKR ubiquitination when it is degraded during RVFV infection (32). Although  
263 RVFV NSs is known to recruit an E3 ligase to PKR, the authors reported that ubiquitinated PKR  
264 is undetectable. Therefore, the cellular degradation signal for PKR remains unclear.

265

### 266 **PKR is actively depleted early in infection.**

267 We investigated when proteasomal degradation of PKR occurs. Early viral proteins are  
268 expressed prior to viral DNA replication, which is then followed by late viral protein expression.  
269 First, we examined the kinetics of PKR degradation to determine whether an early or late viral  
270 protein was likely responsible. We mock infected and infected CMT93 cells with MAV-1 at an  
271 MOI of 10 and collected lysates every six hours for 24 hours and analyzed them by immunoblot  
272 with antibodies to PKR or MAV-1 early region 1A (E1A) protein, the first viral protein made  
273 during infection (68). In infected cells, PKR degradation was first detected at 12 hpi (Fig. 7A),  
274 and quantitation of five independent experiments showed that ~20% of the starting levels of PKR  
275 protein remained at 24 hpi (Fig 7B).

276

277 In parallel, to determine the half-life of PKR in uninfected CMT93 cells, we treated  
278 CMT93 cells with cycloheximide to halt protein translation and thus production of new PKR.  
279 We collected lysates every six hours for 24 hours and analyzed by immunoblot with antibodies  
280 to PKR. After 24 hours of cycloheximide treatment, approximately 90% of the starting levels of  
281 PKR protein remained (Fig. 7A bottom, and B). Comparing the results from MAV-1 infection  
282 (Fig. 7A top, and 7B) and cycloheximide treatment of uninfected cells (Fig. 7A bottom, and 7B),  
283 we conclude that MAV-1 was actively depleting PKR protein early in infection. E1A was  
284 detected by immunoblot at 18 hpi (Fig. 7C), whereas viral DNA replication was first detected at  
285 24 hpi in CMT93 cells (Fig. S6). Thus the 18 hpi timepoint is considered an early time point  
286 during MAV-1 infection of CMT93 cells, prior to DNA replication, suggesting the involvement  
287 of an early viral protein in PKR depletion.

288

### 289 **An early viral function is required for PKR depletion by MAV-1**

290 To determine whether viral gene expression or DNA replication are required for PKR  
291 degradation during infection, we infected C57BL/6 MEFs and CMT93 cells with UV-inactivated  
292 MAV-1 (which does not replicate viral DNA, Fig. S7). We infected cells at an MOI of 10 with  
293 WT MAV-1 or UV-inactivated MAV-1 and analyzed lysates from 24 and 48 hpi by immunoblot  
294 for PKR protein levels. In both cell types, while PKR was degraded by 24 hpi in the cells  
295 infected with WT MAV-1, PKR protein levels were unaffected at both time points in cells  
296 infected with UV-inactivated MAV-1 (Fig. 8A). This suggested that either gene expression or  
297 DNA replication was required for PKR degradation during MAV-1 infection.

298

299 We addressed whether viral DNA replication is needed for PKR degradation. We mock  
300 infected or infected CMT93 cells with MAV-1 at an MOI of 10 and treated them with cytosine  
301 arabinoside (araC) at the time of infection to inhibit DNA synthesis (69, 70). This would allow  
302 the virus to infect the cell and produce early viral proteins, but would inhibit viral DNA  
303 replication and prevent late protein synthesis. We collected lysates at 20 and 40 hpi and analyzed  
304 them by immunoblot. We confirmed that araC treatment resulted in no late protein synthesis by  
305 performing an immunoblot for late virion proteins (Fig. S8). In samples treated with araC, PKR  
306 degradation was seen at 20 and 40 hpi (Fig. 8B), indicating that DNA replication was not  
307 required for PKR degradation. Taken together, the results of Fig. 8 are consistent with early viral  
308 gene expression prior to DNA replication being involved in induction of PKR degradation by  
309 MAV-1.

310

## 311 **Discussion**

312 We have demonstrated here that PKR is antiviral in MAV-1 infections of cultured cells.  
313 Surprisingly, MAV-1 infection of primary and established cultured cells depleted PKR. The  
314 depletion was not due to reduced steady-state levels or reduced translation of PKR mRNA.  
315 Instead, we showed that PKR depletion is inhibited by proteasome inhibitors, implicating  
316 proteasomal degradation of PKR. Several lines of evidence suggest that the degradation is due to  
317 a viral early function.

318

319 PKR is an IFN-inducible gene product that is an important component of the innate  
320 immune response (1, 49). However, not all viruses have increased virulence in PKR<sup>-/-</sup> MEFs,  
321 including EMCV and vaccinia virus (51, 71). While hAds produce VA RNAs that inhibit PKR

322 antiviral activity during infection (10, 72), MAV-1 does not produce such VA RNAs, and how  
323 MAV-1 infection is affected by PKR is first described in this report. When we infected PKR<sup>-/-</sup>  
324 MEFs with MAV-1, viral DNA yields were 5 to 6 times higher than viral DNA yields from wild  
325 type MEFs (Fig. 1), indicating that PKR plays an antiviral role during MAV-1 infection. At 48  
326 hpi, the viral DNA yield from the N-MEFs was nearly 4 times higher than the C-MEFs, but by  
327 72 hpi the viral DNA yields from both types of PKR<sup>-/-</sup> MEFs were similar to each other and  
328 significantly increased compared to wild type MEFs (Fig. 1). This difference in viral replication  
329 kinetics between the two types of PKR<sup>-/-</sup> MEFs may be due to differences in expression level and  
330 activity of the PKR fragments reportedly produced by them; we have not assayed PKR fragment  
331 production in our cells.

332

333 We examined PKR protein levels during MAV-1 infection and found that PKR was  
334 depleted from the cells as early as 12 hpi (Fig. 7). Depletion was seen in a wide variety of cell  
335 types, including immortalized C57BL/6 MEFs, primary C57BL/6 peritoneal macrophages, and  
336 CMT93 mouse colon carcinoma cells. Once depleted, PKR protein levels never returned to mock  
337 infected PKR protein levels during infection. Activation (transautophosphorylation) of PKR (6-  
338 9) was not required for this depletion, because kinase-dead mouse PKR was also depleted from  
339 K271R SV40-MEFs during infection (Fig. 2C). Both PKR and phospho-PKR were depleted in  
340 all cell types examined.

341

342 We examined several possibilities that could explain depletion of PKR protein, including  
343 PKR mRNA levels and alterations in translation. PKR mRNA levels remained unchanged during  
344 MAV-1 infection in C57BL/6 MEFs at 24 hpi and were increased in primary C57BL/6 peritoneal

345 macrophages during MAV-1 infection (Fig. 3), times when the PKR protein levels were depleted  
346 (Fig. 2A). While PKR mRNAs in C57BL/6 MEFs were depleted 33% at 48 hpi and 40% at 72  
347 hpi compared to mock lysates, this is not sufficient to explain the 84% and 94% reduction,  
348 respectively, in PKR protein levels at those time points (Fig. 2B). More likely, the reduction in  
349 PKR steady-state mRNA levels at the late infection time points can be attributed to other effects  
350 from viral infection, including the degradation or inhibition of proteins that induce PKR  
351 expression. For example, p53 is capable of binding to the PKR promoter and inducing its  
352 expression (73), but MAV-1 proteins cause p53 proteolysis (66). Together our results in  
353 C57BL/6 MEFs and macrophages suggest the virus does not cause PKR protein depletion by  
354 reducing PKR steady-state mRNA levels.

355

356       The differences in total PKR mRNA levels during infection between C57BL/6 MEFs and  
357 primary peritoneal macrophages (Fig. 3) is possibly due to the fact that macrophages are an  
358 immune cell, while MEFs are not. PKR protein took almost 3 times as long to be completely  
359 degraded during infection in macrophages compared to MEFs (72 hours versus 24 hours) (Fig.  
360 2A). Total PKR mRNA levels were 2 to 3 times higher in MAV-1-infected macrophages  
361 compared to mock infected macrophages, unlike the MEFs where total PKR mRNA levels were  
362 unchanged or reduced 33-40% during MAV-1-infection compared to mock infected MEFs. Since  
363 PKR is an IFN-stimulated gene (1, 2), higher levels of total PKR mRNA seen during infection in  
364 the macrophages suggests IFN induction. This suggests that the immune response mounted by  
365 the macrophages was greater than the immune response in the MEFs, and could help explain  
366 why PKR took longer to degrade in macrophages compared to MEFs.

367



368           We considered whether reduced PKR levels were due to reduced PKR protein translation.  
369    There was no change in the total amount of PKR mRNA bound to ribosomes during infection  
370    compared to uninfected cells, nor was there a significant change in the amount of actively  
371    translating PKR mRNA during infection (Fig. 4). We also found that the 5' UTR of mouse PKR  
372    placed upstream of a reporter gene produced the same amount of reporter with and without  
373    MAV-1 infection. These data indicate that there are not translational effects of MAV-1 infection  
374    on PKR protein levels that could explain the depleted PKR levels we observed.

375  
376           Inhibiting lysosomal degradation resulted in no change in PKR depletion in infected cells  
377    (Fig. 5A), but adding proteasome inhibitors preserved PKR protein within cells (Fig. 6A and B).  
378    This indicates that PKR is not degraded by lysosomal degradation during viral infection, but by  
379    proteasomal degradation. Though PKR degradation was due to proteasome activity during  
380    MAV-1 infection, we were unable to demonstrate PKR ubiquitination, although we did detect  
381    ubiquitination of mouse p53 (Fig. S5). This inability to demonstrate PKR ubiquitination could be  
382    explained if at any given moment there were only low levels of ubiquitinated PKR present in the  
383    cell. Perhaps, increasing the time under MG132 treatment could increase the amounts of  
384    ubiquitinated proteins enough so that PKR ubiquitination could be seen. However, our inability  
385    to detect ubiquitinated PKR is consistent with a similar inability to identify PKR ubiquitination  
386    by RVFV NSs, even though NSs is known to recruit an E3 ligase to PKR (32). Alternatively, it is  
387    possible that in MAV-1 infection, PKR is degraded in a ubiquitin-independent manner, possibly  
388    because of intrinsic disordered regions of PKR or binding of regulating proteins to PKR that  
389    target proteins to the proteasome (74, 75).

390 Our experiments indicate that MAV-1 actively depletes PKR early in infection. Ongoing  
391 experiments are focused on determining the MAV-1 early protein(s) responsible for PKR  
392 degradation. Two possibilities are E4 proteins, the homologs of hAd E4orf6 and E4orf3, which  
393 we originally termed E4orfa/b and E4orfa/c, respectively (76). In human adenovirus, E4orf6  
394 interacts with another early hAd protein, E1B 55K, to participate in an E3 ligase complex that  
395 ubiquitinates and degrades p53 via proteasomal degradation (77, 78). When MAV-1 E4orf6,  
396 E1B 55K, and mouse p53 are introduced by transfection into human cells, all three proteins  
397 interact and mouse p53 is degraded (66). If MAV-1 E4orf6 and E1B 55K form a similar complex  
398 in mouse cells, it may also degrade PKR. We have preliminary evidence that mouse p53 is  
399 ubiquitinated in C57BL/6 MEFs during MAV-1 infection, which suggests that the mouse p53  
400 degradation seen in human cells could be paralleled by degradation of endogenous mouse p53  
401 and mouse PKR in mouse cells, mediated by MAV-1 E4orf6 and E1B 55K during infection.  
402 Another hAd E4 protein, E4orf3, causes proteasomal degradation of transcriptional intermediary  
403 factor 1 $\gamma$  (79) and general transcription factor II-I (80) in a manner independent of hAd E4orf6  
404 and E1B 55K. E4orf3 has SUMO E3 ligase and E4 elongase activity and induces sumoylation of  
405 general transcription factor II-I, leading to its proteasome-dependent degradation (80). MAV-1  
406 E4orf3 may similarly have sumoylation activity that results ultimately in proteasome-dependent  
407 PKR degradation. Another possibility of a viral protein involved in PKR degradation is the  
408 protease encoded by MAV-1. The hAd protease is encapsidated in virions and proteolytically  
409 processes viral proteins IIIa, VI, VII, VIII, mu, and TP (81-84). However, we think it is unlikely  
410 that the MAV-1 protease degrades PKR, because we showed that UV-inactivated virus was  
411 unable to degrade PKR. We assume that UV treatment would not destroy the MAV-1 protease

412 activity, just as HSV-1 VP16 activity is not altered by UV-inactivation of HSV-1 (85), but we  
413 have not tested this directly.

414

415 In summary, we demonstrated that PKR has an antiviral role during MAV-1 infection *in*  
416 *vitro*, because when PKR is mutated, viral replication in MEFs is significantly higher compared  
417 to wild type MEFs. Analysis of global PKR steady-state protein levels during infection showed  
418 complete PKR depletion by 72 hpi in multiple cell types, including immortalized and primary  
419 cells, with even faster kinetics in some. PKR transcription and translation were not decreased by  
420 MAV-1 infection, whereas proteasomal inhibition prevented PKR degradation. Taken together,  
421 these data suggest that MAV-1 causes PKR to be proteasomally degraded at a post-translational  
422 level. This work provides new insight into possible mechanisms of adenovirus inhibition of PKR  
423 by DNA viruses. PKR degradation may be induced by other adenoviruses that do not produce  
424 VA RNA, which includes all animal adenoviruses except primate adenoviruses and one type of  
425 fowl adenovirus (86).

426

## 427 **Materials and Methods**

428

### 429 **Cells, virus, and infections**

430 CMT93 cells (CCL-223) and C57BL/6 MEFs (SCRC-1008) were obtained from the  
431 American Type Culture Collection and passaged in Dulbecco's modified eagle media (DMEM)  
432 containing 5% or 10% heat-inactivated fetal bovine serum (FBS), respectively, before use.  
433 Primary peritoneal macrophages were obtained from 6-10 week old C57BL/6 mice purchased  
434 from Jackson Laboratory (#000664) as described (87). Briefly, 6-10 week old C57BL/6 mice

435 were injected intraperitoneally with 1.2 mL 3% thioglycolate and euthanized 3-5 days later. The  
436 abdominal skin was carefully removed, exposing the peritoneum, which was then injected with 5  
437 mL of sterile phosphate-buffered saline (PBS). The abdomen was massaged gently, then the PBS  
438 containing the peritoneal macrophages was carefully withdrawn. The macrophages were  
439 centrifuged at 100 x g for 4 minutes, red blood cells lysed in lysis buffer (0.15 M ammonium  
440 chloride, 1 mM potassium bicarbonate, and 0.1 mM EDTA disodium salt) for 2 minutes at room  
441 temperature, centrifuged at 100 x g for 4 minutes, washed twice in PBS, resuspended in DMEM  
442 + 5% heat-inactivated FBS, and plated in 6 well plates. WT and PKR<sup>-/-</sup> MEFs (termed PKR WT  
443 MEFs and N-PKR<sup>-/-</sup> MEFs, respectively, throughout this paper) were obtained from Robert  
444 Silverman, Cleveland Clinic (88) and were passaged in DMEM containing 10% heat-inactivated  
445 FBS before use. PKR<sup>-/-</sup> MEFs stably transfected with empty vector (termed C-PKR<sup>-/-</sup> MEFs  
446 throughout this paper) were obtained from Dr. Gokhan Hotamisligil, Harvard University (89)  
447 and were passaged in DMEM containing 10% heat-inactivated FBS before use. WT (SV40-  
448 MEFs) and K271R PKR mutant (K271R SV40-MEFs) MEFs were obtained from Anthony  
449 Sadler, Hudson Institute of Medical Research (55) and were passaged in DMEM containing 10%  
450 heat-inactivated FBS before use.

451

452 Wild type mouse adenovirus type 1 (MAV-1) stock was prepared and titrated on mouse  
453 NIH 3T6 fibroblasts as described previously (90). WT MAV-1 was UV-inactivated by UV-  
454 treating 200  $\mu$ L of virus for 10 min at 800 mJ/cm<sup>2</sup>. UV inactivation was confirmed by qPCR and  
455 plaque assay.

456

457 For infections, media was removed from cells and adsorption was performed in 0.4 mL of  
458 inocula for 6-well plate 35-mm wells (unless otherwise noted) for 1 hour at 37°C at the indicated  
459 MOIs (PFU/cell). After 60 minutes, 2 mL of DMEM+5% FBS was added without removing  
460 inocula; this time was designated as 0 hpi. For araC experiments, 20 µg/mL araC (Sigma C1768)  
461 was added at 0 hpi and replenished every 12-16 hours.

462

### 463 **Immunoblots**

464 At room temperature, cells were washed once with PBS and Pierce™ RIPA lysis buffer  
465 (Thermo Scientific #89900) with 1x protease inhibitors (Protease Inhibitor Cocktail Kit, Thermo  
466 Scientific #78410) was added to the plate. The cells were allowed to lyse at room temperature for  
467 10 minutes before being harvested and centrifuged at 4°C at 14,000 x g for 10 minutes to remove  
468 debris. Equivalent amounts of protein, determined by a BCA assay (Pierce BCA Protein Assay  
469 Kit, Thermo Scientific #23227), were acetone precipitated by incubating with 4x volume ice cold  
470 acetone overnight at -20°C. Precipitated proteins were pelleted at 4°C at 13,000 x g for 10  
471 minutes and the pellets were dried for 30 minutes at room temperature. Pellets were resuspended  
472 in 10 µL Pierce™ RIPA lysis buffer (Thermo Scientific #89900), 3.25 µL NuPAGE 4x LDS  
473 Sample Buffer (Invitrogen Cat #NP0007), and 1.25 µL 1M DTT. Samples were incubated at  
474 37°C for 10 minutes and then loaded into a well of an 8% acrylamide gel (8.3 cm wide x 7.3 cm  
475 high x 0.1 cm thick) with a 2.5% stacking gel, electrophoresed for 30 minutes at 50 V and 85  
476 minutes at 150 V, and then transferred to a PVDF membrane (BioRad #1620177) for 1 hour at  
477 100V at 4°C. Blots were blocked in 5% bovine serum albumin (BSA, Sigma A7906) in tris-  
478 buffered saline (BioRad #1706435) and 0.1% Tween 20 (Sigma P1379). Blots were probed with  
479 primary antibodies to detect mouse PKR (Santa Cruz D-20 sc-708, 1:2000, or B-10 sc-6282,

480 1:200), mouse actin (Santa Cruz sc-1616-R, 1:1000), MAV-1 E1A (AKO-7-147, 1:1000,  
481 described previously (68)), or MAV-1 late viral proteins (AKO 1-103, 1:1000, described  
482 previously (91, 92)). Secondary antibodies used were IRDye 800CW anti-rabbit (Li-Cor 925-  
483 32213, 1:15,000) or IgG peroxidase-conjugated anti-mouse (Jackson Immuno 515-035-062,  
484 1:20,000). Blots were visualized by LI-COR Odyssey imaging (LI-COR Biosciences) or  
485 enhanced chemiluminescent substrates (Pierce ECL Western Blotting Substrate #32106) and X-  
486 ray film (Dot Scientific #BDB810). Densitometric quantification was performed on .tif files  
487 using ImageJ software from NIH (93).

488

489 To attempt to demonstrate PKR ubiquitination status during MAV-1 infection, C57BL/6  
490 MEFs were transfected with GFP- or HA-epitope tagged ubiquitin plasmids (Addgene #11928  
491 and #18712, respectively) 24 hours before infection. We used Polyplus jetPRIME transfection  
492 reagent (Polyplus #114-15) with 10 µg plasmid DNA and 30 µL jetPRIME reagent per 10 cm  
493 plate. At 12 hpi (36 hours post transfection), we treated mock and infected C57BL/6 MEFs with  
494 10 µM MG132 (Sigma M7449) for 6 hours before collecting lysates at 18 hpi in HCN buffer (50  
495 mM HEPES, 150 mM NaCl, 2 mM CaCl<sub>2</sub>, 1% Triton X-100 (Sigma T9284), 1x protease  
496 inhibitors (Protease Inhibitor Cocktail Kit, Thermo Scientific #78410), and 5 mM N-  
497 ethylmaleimide). The lysates were split into two aliquots, and 3 µg PKR (D-20 sc-708,  
498 discontinued) or 3 µg isotype rabbit polyclonal antibody (Jackson Immuno #011-000-002) was  
499 added to lysates. After rocking samples overnight at 4°C, 20 µL protein A agarose suspension  
500 (Calbiochem/Millipore #IP02-1.5ML) was added to each and samples were rocked at 4°C for 2  
501 hours. After incubation, agarose was washed 3 times with 1 mL HCN buffer, resuspended in 40  
502 µL 2x Laemmli buffer (BioRad #161-0737) with 5% 2-mercaptoethanol (Sigma M6250), and

503 boiled for 10 minutes. Lysate supernatants remaining after the initial PKR immunoprecipitation  
504 were then immunoprecipitated again using the same procedure but with 4 µg anti-p53 (DO-1,  
505 Santa Cruz sc-126) or 4 µg isotype mouse monoclonal antibodies (ThermoFisher Scientific #02-  
506 6200). Immunoprecipitated proteins were immunoblotted for GFP- or HA-epitope tagged  
507 ubiquitin with antibodies for GFP (1:3,000, Roche #11814460001) or HA (1:4,000, Abcam  
508 #ab9110). No ubiquitin signal was detected from the PKR immunoprecipitations, though the  
509 positive control, p53, showed ubiquitin signal with both epitope-tagged ubiquitins (data not  
510 shown). Blots were also probed for PKR (1:200, PKR B-10 sc-6282), p53 (1:200, anti-p53  
511 sc-98), and IRDye 800CW anti-mouse (Li-Cor 925-32212, 1:15,000) to confirm the  
512 immunoprecipitations were successful, and signals for both proteins were detected (data not  
513 shown).

514

### 515 **Viral DNA yield analysis by qPCR**

516 Cells were washed twice with room temperature PBS and harvested by scraping into  
517 PBS, centrifuging at 100 x g for 4 minutes at 4°C, and resuspending in PBS. Total cellular DNA  
518 was purified using the Invitrogen PureLink DNA Purification Kit (Thermo Scientific #K1820-  
519 02) and quantitated by a NanoDrop Spectrophotometer. 10 ng of total cellular DNA was  
520 analyzed by qPCR using custom primers specific to MAV-1 E1A (mE1Agenomic Fwd: 5' GCA  
521 CTC CAT GGC AGG ATT CT 3' and mE1Agenomic Rev 5' GGT CGA AGC AGA CGG TTC  
522 TTC 3') and the results were normalized to GAPDH, which was analyzed using a GAPDH-  
523 specific primer/probe set (ThermoFisher Scientific, Mm99999915\_g1, #4331182).

524

525

## 526 **mRNA analysis by qPCR**

527 Cells were harvested by scraping into media, centrifuging at 100 x g for 4 min at 4°C, and  
528 washing the cell pellet three times with ice-cold PBS. RNA was purified using the Qiagen  
529 RNeasy Mini Kit (Qiagen #74134) and stored at -80°C. 125 ng of RNA per sample was used to  
530 make cDNA using the High Capacity cDNA Reverse Transcription Kit (Applied Biosystems  
531 #4368814), and 2 µL of the cDNA was analyzed by qPCR using a primer/probe set specific to  
532 mouse PKR sequence (Thermo Fisher, Mm01235643\_m1, #4331182). The results were  
533 normalized to GAPDH, which was analyzed using a GAPDH-specific primer/probe set  
534 (ThermoFisher Scientific, Mm99999915\_g1, #4331182). Arbitrary units were calculated as  
535 follows:  $\text{Mean } C_T \text{ PKR} - \text{mean } C_T \text{ GAPDH} = \Delta C_T \text{ for sample. Arbitrary unit} = 2^{-\Delta C_T}$ .

536

## 537 **Proteasome inhibition**

538 C57BL/6 MEFs were infected at an MOI of 10, and DMSO, 1 µM MG132 (Sigma  
539 M7449), or 1 µM bortezomib (Selleckchem #S1013) were added to the media after a 1 hour  
540 adsorption. At 24 hpi, cells were washed once with room temperature PBS, and Pierce<sup>TM</sup> RIPA  
541 lysis buffer (Thermo Scientific #89900) with 1x protease inhibitors (Protease Inhibitor Cocktail  
542 Kit, Thermo Scientific #78410) was added to the plate. The cells were allowed to lyse at room  
543 temperature for 10 minutes before being harvested and centrifuged at 4°C at 14,000 x g for 10  
544 minutes to remove debris.

545

## 546 **Lysosome inhibition and DQ BSA assay**

547 CMT93 cells were infected at an MOI of 10. After a 1 hour adsorption, 10 µL water, 10  
548 mM NH<sub>4</sub>Cl (final concentration, Baker Chemical Company #0660-1), or 60 µM chloroquine



549 (final concentration, Sigma C6628) was added to the media. At 24 hpi, at room temperature,  
550 cells were washed once with PBS and Pierce<sup>TM</sup> RIPA lysis buffer (Thermo Scientific #89900)  
551 with 1x protease inhibitors (Protease Inhibitor Cocktail Kit, Thermo Scientific #78410) was  
552 added to the plate. The cells were allowed to lyse at room temperature for 10 minutes before  
553 being harvested and centrifuged at 4°C at 14,000 x g for 10 minutes to remove debris.

554

555 The DQ BSA assay was performed as described (60). Briefly, C57BL/6 MEFs and  
556 CMT93 cells were plated at  $1.5 \times 10^5$  cells/plate or  $3 \times 10^5$  cells/plate, respectively, in MatTek  
557 Glass Bottom Microwell Dishes (Part No: P35G-1.5-14C) with 2 mL of DMEM + 10% or 5%  
558 FBS, respectively. The next day, the cell media was treated with 10  $\mu$ L water, 10 mM NH<sub>4</sub>Cl  
559 (final concentration), or 60  $\mu$ M chloroquine (final concentration, Sigma C6628). Four hours after  
560 adding inhibitors, DQ Red BSA (Invitrogen Cat #D12051) was added to the media to a final  
561 concentration of 5  $\mu$ g/mL in 2 mL DMEM + 10% or 5% FBS, respectively. At 24 hours post  
562 treatment, the cells were imaged on a Nikon TE300 inverted microscope equipped with a  
563 mercury arc lamp, Plan-Apochromat 60x, 1.4 NA objective, cooled digital CCD camera (Quantix  
564 Photometrics, Tucson, AZ), and a temperature-controlled stage, set at 37°C. To image the DQ-  
565 BSA, we used an excitation filter centered at 572 nm and an emission filter centered at 635 nm.  
566 The exposure time was the same for all images.

567

### 568 **Ribosome pelleting**

569 Ribosomes were pelleted as described (94). Briefly, C57BL/6 MEFs were plated on 10  
570 cm plates,  $3 \times 10^5$  cells per plate. The next day, the cells (~90% confluent) were infected with  
571 MAV-1 at an MOI of 5. C57BL/6 MEF lysates were collected at 48 hpi by scraping the cells in

572 ice-cold PBS containing 100 µg/mL cycloheximide (Sigma C7698), pelleting, and resuspending  
573 in lysis buffer, which was 10 mM HEPES pH 7.5, 100 mM KCl, 5 mM MgCl<sub>2</sub>, 4 mM DTT,  
574 0.5% NP-40, 100 µg/mL cycloheximide, 20 U/mL RNasin (Promega # N2511), 10% sucrose,  
575 and 1x protease inhibitors (Protease Inhibitor Cocktail Kit, Thermo Scientific #78410). Cells  
576 were lysed by passage through a chilled 26G needle five times and cleared by centrifugation for  
577 10 min at 21,000 x g at 4°C. 400 µL of cleared lysate (10 OD<sub>260nm</sub> units) was layered onto 25%  
578 sucrose and centrifuged 29,500 rpm in an SW41 rotor (107,458 rcf average) for 4 hours at 4°C.  
579 After pelleting, the supernatant was removed with a micropipet and 350 µL of 4°C Buffer RLT  
580 Plus (from Qiagen RNeasy Mini Kit) was added to the pellet to collect the RNA. RNA was  
581 purified immediately using the Qiagen RNeasy Mini Kit (Qiagen #74134) and stored at -80°C  
582 until analysis.

583

#### 584 **Polyribosome Gradients**

585 C57BL/6 MEFs were plated on 10 cm plates, 2 x 10<sup>6</sup> cells per plate. The next day, the  
586 cells were infected with MAV-1 at an MOI of 2. Following a standard protocol (95), 5 minutes  
587 prior to collection, cycloheximide was added at a final concentration of 100 µg/mL and  
588 incubated at 37°C. Cells were collected at 24 hpi by scraping in ice-cold PBS containing 100  
589 µg/mL cycloheximide, pelleting, and resuspending in 500 µL lysis buffer (20 mM Tris-Cl, 150  
590 mM NaCl, 15 mM MgCl<sub>2</sub>, 8% glycerol, 20 IU/mL SUPERase•In (ThermoFisher Scientific Cat#  
591 AM2696), 80 IU/mL Murine RNase Inhibitor (New England BioLabs Cat# M0314S), 0.1  
592 mg/mL heparin (Sigma H3393-50), 0.1mg/mL cycloheximide, 1 mM DTT, 1x protease inhibitor  
593 (Protease Inhibitor Cocktail Kit, Thermo Scientific #78410), 20 IU/mL Turbo DNase  
594 (ThermoFisher Scientific Cat# AM2238), and 1% Triton X-100 (Sigma T9284). Cells were lysed

595 by passaging through a chilled 26G needle ten times, vortexing for 30 seconds, and then  
596 incubating on ice for 5 min. Lysates were cleared by centrifugation for 5 min at 14,000 x g at  
597 4°C. 500 µL of cleared lysate (10 OD<sub>260nm</sub>) was layered onto a 10-50% sucrose gradient and  
598 centrifuged at 35,000 rpm in an SW41 rotor (151,000 rcf) for 3 hours at 4°C. After  
599 centrifugation, gradients were pumped out of the top with a Brandel BR-188 Density Gradient  
600 Fractionation System with a continuous reading of the OD<sub>254 nm</sub>. From 24-34 fractions (350-500  
601 µL) were collected. RNA was purified from selected fractions immediately using the Qiagen  
602 RNeasy Mini Kit (Qiagen #74134) and stored at -80°C until analysis by RT-qPCR.

603

#### 604 **Statistical analyses**

605 Data were analyzed with GraphPad Prism 7.0 software. For qPCR and densitometry  
606 analyses, the data were analyzed by individual Mann-Whitney tests. A value of  $P < 0.5$  was  
607 considered significant.

608

#### 609 **Acknowledgments**

610 We thank Robert Silverman, Gokhan Hotamisligil, and Anthony Sadler for PKR mutant  
611 and wild type cells. We thank Katelyn Green, Becky Billmire, and Peter Todd for the use of and  
612 assistance with the Brandel BR-188 Density Gradient Fractionation System and for providing the  
613 nanoluciferase and firefly luciferase plasmids. We thank Zachary Mendel and Joel Swanson for  
614 assistance with imaging the DQ BSA assay. We thank Jason Weinberg, Michael Imperiale,  
615 Christiane Wobus, Billy Tsai, Andrew Mehle, Mitch Ledwith, Mike Mathews, Chuck Samuel,  
616 and Britt Glaunsinger for helpful discussions. We thank Michael Imperiale and Christiane  
617 Wobus for comments on the manuscript.

618

619 This work was supported by HHS/NIH/National Institute of Allergy and Infectious  
620 Diseases (NIAID), 5 R01AI091721 and 1 R01AI133935 (Katherine R. Spindler); and NIH  
621 Cellular and Molecular Biology Training Grant T32 GM007315, and Rackham Pre-Candidate  
622 and Candidate Student Research Grants (Danielle E. Goodman).

623

## 624 **References**

625

- 626 1. Meurs E, Chong K, Galabru J, Thomas NS, Kerr IM, Williams BR, Hovanessian AG.  
627 1990. Molecular cloning and characterization of the human double-stranded RNA-  
628 activated protein kinase induced by interferon. *Cell* 62:379-90.
- 629 2. McCormack SJ, Thomis DC, Samuel CE. 1992. Mechanism of interferon action:  
630 identification of a RNA binding domain within the N-terminal region of the human RNA-  
631 dependent P1/eIF-2 alpha protein kinase. *Virology* 188:47-56.
- 632 3. Feng GS, Chong K, Kumar A, Williams BR. 1992. Identification of double-stranded  
633 RNA-binding domains in the interferon-induced double-stranded RNA-activated p68  
634 kinase. *Proc Natl Acad Sci USA* 89:5447-51.
- 635 4. Kuhlen KL, Samuel CE. 1997. Isolation of the interferon-inducible RNA-dependent  
636 protein kinase Pkr promoter and identification of a novel DNA element within the 5'-  
637 flanking region of human and mouse Pkr genes. *Virology* 227:119-30.
- 638 5. Patel RC, Sen GC. 1992. Identification of the double-stranded RNA-binding domain of  
639 the human interferon-inducible protein kinase. *J Biol Chem* 267:7671-6.
- 640 6. Dabo S, Meurs EF. 2012. dsRNA-dependent protein kinase PKR and its role in stress,  
641 signaling and HCV infection. *Viruses* 4:2598-635.
- 642 7. Mundschau LJ, Faller DV. 1994. Endogenous inhibitors of the dsRNA-dependent eIF-2  
643 alpha protein kinase PKR in normal and ras-transformed cells. *Biochimie* 76:792-800.
- 644 8. Hovanessian AG, Galabru J. 1987. The double-stranded RNA-dependent protein kinase  
645 is also activated by heparin. *Eur J Biochem* 167:467-73.
- 646 9. Galabru J, Hovanessian A. 1987. Autophosphorylation of the protein kinase dependent on  
647 double-stranded RNA. *J Biol Chem* 262:15538-44.
- 648 10. Berk AJ. 2013. Adenoviridae: The viruses and their replication. *In* Knipe DM, Howley P  
649 (ed), *Fields Virology*, 6th ed, vol 2. Lippincott Williams & Wilkins, Philadelphia.
- 650 11. Wek RC. 2018. Role of eIF2alpha kinases in translational control and adaptation to  
651 cellular stress. *Cold Spring Harb Perspect Biol* 10.
- 652 12. Farrell PJ, Balkow K, Hunt T, Jackson RJ, Trachsel H. 1977. Phosphorylation of  
653 initiation factor eIF-2 and the control of reticulocyte protein synthesis. *Cell* 11:187-200.
- 654 13. Tahara SM, Traugh JA, Sharp SB, Lundak TS, Safer B, Merrick WC. 1978. Effect of  
655 hemin on site-specific phosphorylation of eukaryotic initiation factor 2. *Proc Natl Acad*  
656 *Sci USA* 75:789-93.

- 657 14. Dzananovic E, McKenna SA, Patel TR. 2018. Viral proteins targeting host protein kinase  
658 R to evade an innate immune response: A mini review. *Biotechnol Genet Eng Rev* 34:33-  
659 59.
- 660 15. Chang HW, Jacobs BL. 1993. Identification of a conserved motif that is necessary for  
661 binding of the vaccinia virus E3L gene products to double-stranded RNA. *Virology*  
662 194:537-47.
- 663 16. Rice AD, Turner PC, Embury JE, Moldawer LL, Baker HV, Moyer RW. 2011. Roles of  
664 vaccinia virus genes E3L and K3L and host genes PKR and RNase L during intratracheal  
665 infection of C57BL/6 mice. *J Virol* 85:550-67.
- 666 17. Carroll K, Elroy-Stein O, Moss B, Jagus R. 1993. Recombinant vaccinia virus K3L gene  
667 product prevents activation of double-stranded RNA-dependent, initiation factor 2 alpha-  
668 specific protein kinase. *J Biol Chem* 268:12837-42.
- 669 18. Lu Y, Wambach M, Katze MG, Krug RM. 1995. Binding of the influenza virus NS1  
670 protein to double-stranded RNA inhibits the activation of the protein kinase that  
671 phosphorylates the eIF-2 translation initiation factor. *Virology* 214:222-8.
- 672 19. Tan SL, Katze MG. 1998. Biochemical and genetic evidence for complex formation  
673 between the influenza A virus NS1 protein and the interferon-induced PKR protein  
674 kinase. *J Interferon Cytokine Res* 18:757-66.
- 675 20. Cardenas WB, Loo YM, Gale M, Jr., Hartman AL, Kimberlin CR, Martinez-Sobrido L,  
676 Saphire EO, Basler CF. 2006. Ebola virus VP35 protein binds double-stranded RNA and  
677 inhibits alpha/beta interferon production induced by RIG-I signaling. *J Virol* 80:5168-78.
- 678 21. Poppers J, Mulvey M, Khoo D, Mohr I. 2000. Inhibition of PKR activation by the  
679 proline-rich RNA binding domain of the herpes simplex virus type 1 Us11 protein. *J*  
680 *Virol* 74:11215-21.
- 681 22. Cassady KA, Gross M, Roizman B. 1998. The herpes simplex virus US11 protein  
682 effectively compensates for the gamma1(34.5) gene if present before activation of protein  
683 kinase R by precluding its phosphorylation and that of the alpha subunit of eukaryotic  
684 translation initiation factor 2. *J Virol* 72:8620-6.
- 685 23. Cai R, Carpick B, Chun RF, Jeang KT, Williams BR. 2000. HIV-1 TAT inhibits PKR  
686 activity by both RNA-dependent and RNA-independent mechanisms. *Arch Biochem*  
687 *Biophys* 373:361-7.
- 688 24. McMillan NA, Chun RF, Siderovski DP, Galabru J, Toone WM, Samuel CE, Mak TW,  
689 Hovanessian AG, Jeang KT, Williams BR. 1995. HIV-1 Tat directly interacts with the  
690 interferon-induced, double-stranded RNA-dependent kinase, PKR. *Virology* 213:413-24.
- 691 25. Park H, Davies MV, Langland JO, Chang HW, Nam YS, Tartaglia J, Paoletti E, Jacobs  
692 BL, Kaufman RJ, Venkatesan S. 1994. TAR RNA-binding protein is an inhibitor of the  
693 interferon-induced protein kinase PKR. *Proc Natl Acad Sci USA* 91:4713-7.
- 694 26. Thimmappaya B, Weinberger C, Schneider RJ, Shenk T. 1982. Adenovirus VAI RNA is  
695 required for efficient translation of viral mRNAs at late times after infection. *Cell* 31:543-  
696 51.
- 697 27. Mathews MB, Grodzicker T. 1981. Virus-associated RNAs of naturally occurring strains  
698 and variants of group C adenoviruses. *J Virol* 38:849-62.
- 699 28. Reich PR, Forget BG, Weissman SM. 1966. RNA of low molecular weight in KB cells  
700 infected with adenovirus type 2. *J Mol Biol* 17:428-39.
- 701 29. Kalveram B, Ikegami T. 2013. Toscana virus NSs protein promotes degradation of  
702 double-stranded RNA-dependent protein kinase. *J Virol* 87:3710-8.

- 703 30. Habjan M, Pichlmair A, Elliott RM, Overby AK, Glatter T, Gstaiger M, Superti-Furga G,  
704 Unger H, Weber F. 2009. NSs protein of Rift Valley fever virus induces the specific  
705 degradation of the double-stranded RNA-dependent protein kinase. *J Virol* 83:4365-75.
- 706 31. Ikegami T, Narayanan K, Won S, Kamitani W, Peters CJ, Makino S. 2009. Rift Valley  
707 fever virus NSs protein promotes post-transcriptional downregulation of protein kinase  
708 PKR and inhibits eIF2 $\alpha$  phosphorylation. *PLoS Pathog* 5:e1000287.
- 709 32. Mudhasani R, Tran JP, Retterer C, Kota KP, Whitehouse CA, Bavari S. 2016. Protein  
710 kinase R degradation is essential for Rift Valley fever virus infection and is regulated by  
711 SKP1-CUL1-F-box (SCF)FBXW11-NSs E3 ligase. *PLoS Pathog* 12:e1005437.
- 712 33. Black TL, Barber GN, Katze MG. 1993. Degradation of the interferon-induced 68,000-  
713 M(r) protein kinase by poliovirus requires RNA. *J Virol* 67:791-800.
- 714 34. Black TL, Safer B, Hovanessian A, Katze MG. 1989. The cellular 68,000-Mr protein  
715 kinase is highly autophosphorylated and activated yet significantly degraded during  
716 poliovirus infection: Implications for translational regulation. *J Virol* 63:2244-51.
- 717 35. Li W, Zhu Z, Cao W, Yang F, Zhang X, Li D, Zhang K, Li P, Mao R, Liu X, Zheng H.  
718 2016. Esterase D enhances type I interferon signal transduction to suppress foot-and-  
719 mouth disease virus replication. *Mol Immunol* 75:112-21.
- 720 36. Li C, Zhu Z, Du X, Cao W, Yang F, Zhang X, Feng H, Li D, Zhang K, Liu X, Zheng H.  
721 2017. Foot-and-mouth disease virus induces lysosomal degradation of host protein kinase  
722 PKR by 3C proteinase to facilitate virus replication. *Virology* 509:222-231.
- 723 37. Rabouw HH, Langereis MA, Knaap RC, Dalebout TJ, Canton J, Sola I, Enjuanes L,  
724 Bredenbeek PJ, Kikkert M, de Groot RJ, van Kuppeveld FJ. 2016. Middle East  
725 respiratory coronavirus accessory protein 4a inhibits PKR-mediated antiviral stress  
726 responses. *PLoS Pathog* 12:e1005982.
- 727 38. Hovanessian AG, Galabru J, Meurs E, Buffet-Janvresse C, Svab J, Robert N. 1987. Rapid  
728 decrease in the levels of the double-stranded RNA-dependent protein kinase during virus  
729 infections. *Virology* 159:126-36.
- 730 39. Chang YH, Lau KS, Kuo RL, Horng JT. 2017. dsRNA binding domain of PKR is  
731 proteolytically released by enterovirus A71 to facilitate viral replication. *Front Cell Infect*  
732 *Microbiol* 7:284.
- 733 40. Kalveram B, Ikegami T. 2013. Toscana virus NSs protein promotes degradation of  
734 double-stranded RNA-dependent protein kinase. *J Virol* 87:3710-8.
- 735 41. Kainulainen M, Lau S, Samuel CE, Hornung V, Weber F. 2016. NSs virulence factor of  
736 Rift Valley fever virus engages the F-box proteins FBXW11 and beta-TRCP1 to degrade  
737 the antiviral protein kinase PKR. *J Virol* 90:6140-7.
- 738 42. Kring SC, King CS, Spindler KR. 1995. Susceptibility and signs associated with mouse  
739 adenovirus type 1 infection of adult outbred Swiss mice. *J Virol* 69:8084-8.
- 740 43. Spindler KR, Moore ML, Cauthen AN. 2007. Mouse adenoviruses, p 49-65, The mouse  
741 in biomedical research, 2nd ed, vol 2. Academic Press, New York, NY.
- 742 44. Blailock ZR, Rabin ER, Melnick JL. 1968. Adenovirus myocarditis in mice. An electron  
743 microscopic study. *Exp Mol Pathol* 9:84-96.
- 744 45. McCarthy MK, Procaro MC, Twisselmann N, Wilkinson JE, Archambeau AJ, Michele  
745 DE, Day SM, Weinberg JB. 2015. Proinflammatory effects of interferon gamma in  
746 mouse adenovirus 1 myocarditis. *J Virol* 89:468-79.

- 747 46. Guida JD, Fejer G, Pirofski LA, Brosnan CF, Horwitz MS. 1995. Mouse adenovirus type  
748 1 causes a fatal hemorrhagic encephalomyelitis in adult C57BL/6 but not BALB/c mice. *J*  
749 *Virol* 69:7674-81.
- 750 47. Mathews MB, Shenk T. 1991. Adenovirus virus-associated RNA and translation control.  
751 *J Virol* 65:5657-62.
- 752 48. Meissner JD, Hirsch GN, LaRue EA, Fulcher RA, Spindler KR. 1997. Completion of the  
753 DNA sequence of mouse adenovirus type 1: Sequence of E2B, L1, and L2 (18-51 map  
754 units). *Virus Res* 51:53-64.
- 755 49. Balachandran S, Roberts PC, Brown LE, Truong H, Pattnaik AK, Archer DR, Barber  
756 GN. 2000. Essential role for the dsRNA-dependent protein kinase PKR in innate  
757 immunity to viral infection. *Immunity* 13:129-41.
- 758 50. Stojdl DF, Abraham N, Knowles S, Marius R, Brasey A, Lichty BD, Brown EG,  
759 Sonenberg N, Bell JC. 2000. The murine double-stranded RNA-dependent protein kinase  
760 PKR is required for resistance to vesicular stomatitis virus. *J Virol* 74:9580-5.
- 761 51. Xiang Y, Condit RC, Vijaysri S, Jacobs B, Williams BR, Silverman RH. 2002. Blockade  
762 of interferon induction and action by the E3L double-stranded RNA binding proteins of  
763 vaccinia virus. *J Virol* 76:5251-9.
- 764 52. Baltzis D, Li S, Koromilas AE. 2002. Functional characterization of pkr gene products  
765 expressed in cells from mice with a targeted deletion of the N terminus or C terminus  
766 domain of PKR. *J Biol Chem* 277:38364-72.
- 767 53. Yang YL, Reis LF, Pavlovic J, Aguzzi A, Schafer R, Kumar A, Williams BR, Aguet M,  
768 Weissmann C. 1995. Deficient signaling in mice devoid of double-stranded RNA-  
769 dependent protein kinase. *EMBO J* 14:6095-106.
- 770 54. Abraham N, Stojdl DF, Duncan PI, Methot N, Ishii T, Dube M, Vanderhyden BC, Atkins  
771 HL, Gray DA, McBurney MW, Koromilas AE, Brown EG, Sonenberg N, Bell JC. 1999.  
772 Characterization of transgenic mice with targeted disruption of the catalytic domain of  
773 the double-stranded RNA-dependent protein kinase, PKR. *J Biol Chem* 274:5953-62.
- 774 55. Yim HC, Wang D, Yu L, White CL, Faber PW, Williams BR, Sadler AJ. 2016. The  
775 kinase activity of PKR represses inflammasome activity. *Cell Res* 26:367-79.
- 776 56. Felicetti L, Colombo B, Baglioni C. 1966. Inhibition of protein synthesis in reticulocytes  
777 by antibiotics. II. The site of action of cycloheximide, streptovitacin A and pactamycin.  
778 *Biochim Biophys Acta* 119:120-9.
- 779 57. Kearse MG, Green KM, Krans A, Rodriguez CM, Linsalata AE, Goldstrohm AC, Todd  
780 PK. 2016. CGG repeat-associated non-AUG translation utilizes a cap-dependent scanning  
781 mechanism of initiation to produce toxic proteins. *Mol Cell* 62:314-322.
- 782 58. Cooper GM. 2000. Protein Degradation, *The Cell: A Molecular Approach*, 2nd ed.  
783 Sinauer Associates, Sunderland, MA.
- 784 59. Marwaha R, Sharma M. 2017. DQ-Red BSA Trafficking Assay in Cultured Cells to  
785 Assess Cargo Delivery to Lysosomes. *Bio Protoc* 7.
- 786 60. Palm W, Park Y, Wright K, Pavlova NN, Tuveson DA, Thompson CB. 2015. The  
787 utilization of extracellular proteins as nutrients is suppressed by mTORC1. *Cell* 162:259-  
788 270.
- 789 61. Guo N, Peng Z. 2013. MG132, a proteasome inhibitor, induces apoptosis in tumor cells.  
790 *Asia Pac J Clin Oncol* 9:6-11.

- 791 62. Chen D, Frezza M, Schmitt S, Kanwar J, Dou QP. 2011. Bortezomib as the first  
792 proteasome inhibitor anticancer drug: current status and future perspectives. *Curr Cancer*  
793 *Drug Targets* 11:239-53.
- 794 63. Berkers CR, Verdoes M, Lichtman E, Fiebiger E, Kessler BM, Anderson KC, Ploegh HL,  
795 Ovaa H, Galardy PJ. 2005. Activity probe for in vivo profiling of the specificity of  
796 proteasome inhibitor bortezomib. *Nat Methods* 2:357-62.
- 797 64. Ciechanover A, Heller H, Elias S, Haas AL, Hershko A. 1980. ATP-dependent  
798 conjugation of reticulocyte proteins with the polypeptide required for protein  
799 degradation. *Proc Natl Acad Sci USA* 77:1365-8.
- 800 65. Hershko A, Ciechanover A, Heller H, Haas AL, Rose IA. 1980. Proposed role of ATP in  
801 protein breakdown: conjugation of protein with multiple chains of the polypeptide of  
802 ATP-dependent proteolysis. *Proc Natl Acad Sci USA* 77:1783-6.
- 803 66. Gilson T, Blanchette P, Ballmann MZ, Papp T, Penzes JJ, Benko M, Harrach B, Branton  
804 PE. 2016. Using the E4orf6-Based E3 ubiquitin ligase as a tool to analyze the evolution  
805 of adenoviruses. *J Virol* 90:7350-7367.
- 806 67. Bernardi KM, Williams JM, Inoue T, Schultz A, Tsai B. 2013. A deubiquitinase  
807 negatively regulates retro-translocation of nonubiquitinated substrates. *Mol Biol Cell*  
808 24:3545-56.
- 809 68. Smith K, Ying B, Ball AO, Beard CW, Spindler KR. 1996. Interaction of mouse  
810 adenovirus type 1 early region 1A protein with cellular proteins pRb and p107. *Virology*  
811 224:184-97.
- 812 69. Mayne LV. 1984. Inhibitors of DNA synthesis (aphidicolin and araC/HU) prevent the  
813 recovery of RNA synthesis after UV-irradiation. *Mutat Res* 131:187-91.
- 814 70. Zittoun J, Marquet J, David JC, Maniey D, Zittoun R. 1989. A study of the mechanisms  
815 of cytotoxicity of Ara-C on three human leukemic cell lines. *Cancer Chemother*  
816 *Pharmacol* 24:251-5.
- 817 71. Zhou A, Paranjape JM, Der SD, Williams BR, Silverman RH. 1999. Interferon action in  
818 triply deficient mice reveals the existence of alternative antiviral pathways. *Virology*  
819 258:435-40.
- 820 72. Ma Y, Mathews MB. 1996. Structure, function, and evolution of adenovirus-associated  
821 RNA: a phylogenetic approach. *J Virol* 70:5083-99.
- 822 73. Yoon CH, Lee ES, Lim DS, Bae YS. 2009. PKR, a p53 target gene, plays a crucial role in  
823 the tumor-suppressor function of p53. *Proc Natl Acad Sci USA* 106:7852-7.
- 824 74. Baugh JM, Viktorova EG, Pilipenko EV. 2009. Proteasomes can degrade a significant  
825 proportion of cellular proteins independent of ubiquitination. *J Mol Biol* 386:814-27.
- 826 75. Maupin-Furlow J. 2011. Proteasomes and protein conjugation across domains of life. *Nat*  
827 *Rev Microbiol* 10:100-11.
- 828 76. Kring SC, Ball AO, Spindler KR. 1992. Transcription mapping of mouse adenovirus type  
829 1 early region 4. *Virology* 190:248-55.
- 830 77. Querido E, Blanchette P, Yan Q, Kamura T, Morrison M, Boivin D, Kaelin WG,  
831 Conaway RC, Conaway JW, Branton PE. 2001. Degradation of p53 by adenovirus  
832 E4orf6 and E1B55K proteins occurs via a novel mechanism involving a Cullin-  
833 containing complex. *Genes Dev* 15:3104-17.
- 834 78. Harada JN, Shevchenko A, Shevchenko A, Pallas DC, Berk AJ. 2002. Analysis of the  
835 adenovirus E1B-55K-anchored proteome reveals its link to ubiquitination machinery. *J*  
836 *Virol* 76:9194-206.



- 837 79. Forrester NA, Patel RN, Speiseder T, Groitl P, Sedgwick GG, Shimwell NJ, Seed RI,  
838 Catnaigh PO, McCabe CJ, Stewart GS, Dobner T, Grand RJ, Martin A, Turnell AS. 2012.  
839 Adenovirus E4orf3 targets transcriptional intermediary factor 1gamma for proteasome-  
840 dependent degradation during infection. *J Virol* 86:3167-79.
- 841 80. Sohn SY, Hearing P. 2016. The adenovirus E4-ORF3 protein functions as a SUMO E3  
842 ligase for TIF-1gamma sumoylation and poly-SUMO chain elongation. *Proc Natl Acad*  
843 *Sci USA* 113:6725-30.
- 844 81. Weber J. 1976. Genetic analysis of adenovirus type 2 III. Temperature sensitivity of  
845 processing viral proteins. *J Virol* 17:462-71.
- 846 82. Anderson CW, Baum PR, Gesteland RF. 1973. Processing of adenovirus 2-induced  
847 proteins. *J Virol* 12:241-52.
- 848 83. Weber JM, Anderson CW. 1988. Identification of the gene coding for the precursor of  
849 adenovirus core protein X. *J Virol* 62:1741-5.
- 850 84. Anderson CW. 1990. The proteinase polypeptide of adenovirus serotype 2 virions.  
851 *Virology* 177:259-72.
- 852 85. Sanfilippo CM, Chirimuuta FN, Blaho JA. 2004. Herpes simplex virus type 1 immediate-  
853 early gene expression is required for the induction of apoptosis in human epithelial HEP-  
854 2 cells. *J Virol* 78:224-39.
- 855 86. Anonymous. 2011. Virus Taxonomy: Ninth report of the international committee on  
856 taxonomy of viruses, p 128. *In* King AMQ, Adams MJ, Carstens EB, Lefkowitz EJ (ed).  
857 Elsevier.
- 858 87. Ashley SL, Welton AR, Harwood KM, Van Rooijen N, Spindler KR. 2009. Mouse  
859 adenovirus type 1 infection of macrophages. *Virology* 390:307-14.
- 860 88. Sawicki DL, Silverman RH, Williams BR, Sawicki SG. 2003. Alphavirus minus-strand  
861 synthesis and persistence in mouse embryo fibroblasts derived from mice lacking RNase  
862 L and protein kinase R. *J Virol* 77:1801-11.
- 863 89. Nakamura T, Kunz RC, Zhang C, Kimura T, Yuan CL, Baccaro B, Namiki Y, Gygi SP,  
864 Hotamisligil GS. 2015. A critical role for PKR complexes with TRBP in  
865 Immunometabolic regulation and eIF2alpha phosphorylation in obesity. *Cell Rep* 11:295-  
866 307.
- 867 90. Cauthen AN, Welton AR, Spindler KR. 2007. Construction of mouse adenovirus type 1  
868 mutants. *Methods Mol Med* 130:41-59.
- 869 91. Kajon AE, Brown CC, Spindler KR. 1998. Distribution of mouse adenovirus type 1 in  
870 intraperitoneally and intranasally infected adult outbred mice. *J Virol* 72:1219-23.
- 871 92. Cauthen AN, Spindler KR. 1999. Novel expression of mouse adenovirus type 1 early  
872 region 3 gp11K at late times after infection. *Virology* 259:119-28.
- 873 93. Schindelin J, Rueden CT, Hiner MC, Eliceiri KW. 2015. The ImageJ ecosystem: An open  
874 platform for biomedical image analysis. *Mol Reprod Dev* 82:518-29.
- 875 94. Sheets MD, Fritz B, Hartley RS, Zhang Y. 2010. Polyribosome analysis for investigating  
876 mRNA translation in *Xenopus* oocytes, eggs and embryos. *Methods* 51:152-6.
- 877 95. Morita M, Alain T, Topisirovic I, Sonenberg N. 2013. Polysome profiling analysis. *Bio-*  
878 *protocol* 3:e833.

880

881 **Figure Legends**

882 **Figure 1.** Viral DNA yield is increased in PKR<sup>-/-</sup> mouse embryonic fibroblasts. PKR WT MEFs  
883 (WT), N-PKR<sup>-/-</sup> MEFs (N-), and C-PKR<sup>-/-</sup> MEFs (C-) were infected with MAV-1 at an MOI 1  
884 and collected at 48 and 72 hpi. DNA was purified from cell pellets and analyzed for MAV-1  
885 genome copies by qPCR. Graph is representative of three experiments, 14 biological replicates  
886 per cell line per time point. Error bars are standard error of the mean (SEM). \* $P \leq 0.05$ , \*\*\* $P \leq$   
887 0.0002, \*\*\*\* $P \leq 0.0001$ .

888

889 **Figure 2.** Mouse PKR is depleted during MAV-1 infection. (A) Cells (indicated at left) were  
890 infected with MAV-1 (MAV) at an MOI of 10 or mock infected (mock). Cell lysates were  
891 collected at the indicated times and analyzed by immunoblot with antibodies for PKR (B-10 for  
892 C57BL/6 MEFs and D-20 for C57BL/6 primary peritoneal macrophages and CMT93 cells) and  
893 actin. Blots are representative of a minimum of three independent experiments per cell line. (B)  
894 Densitometry quantitation of five C57BL/6 MEFs immunoblots from A. Error bars are SEM.  
895 N=5 for 24 hpi, n=4 for 48 hpi, and n=2 for 72 hpi. \*\* $P \leq 0.01$ . (C) SV40-MEFs or kinase-dead  
896 (K271R) SV40-MEFs were infected with MAV-1 at an MOI of 10. Cell lysates were  
897 immunoblotted as in A with PKR D-20. Numbers below are the proportion of PKR protein for  
898 each time point, normalized to actin and the mock PKR protein levels from the corresponding  
899 time point.

900

901 **Figure 3.** MAV-1 does not cause PKR depletion by reducing steady state levels of PKR mRNA  
902 at times when the protein levels are already reduced. MEFs (A) or isolated primary peritoneal  
903 macrophages (B) were harvested and infected with MAV-1 at an MOI of 10 or mock infected.

904 The cell pellets were collected and RNA was isolated. cDNA was generated from the RNA, and  
905 qPCR was used to quantitate PKR mRNA levels. Each graph contains 5-7 replicates for each  
906 time point from three pooled experiments. Error bars show the SEM.  $*P \leq 0.05$  and  $**P \leq 0.01$ .

907  
908 **Figure 4.** MAV-1 infection does not affect PKR translation. (A) C57BL/6 MEFs were infected  
909 with MAV-1 (MAV) at an MOI of 5 or mock infected (mock) and collected at 48 hpi. Cells were  
910 lysed, and cleared lysates from three 10 cm plates were layered onto 25% sucrose and  
911 centrifuged to pellet ribosomes. RNA was purified from the pellets, cDNA was generated from  
912 the RNA, and qPCR was used to quantitate the PKR mRNA levels. The graph contains 9  
913 replicates for each time point, pooled from 3 independent experiments. Error bars show the  
914 SEM. (B) C57BL/6 MEFs were infected with MAV-1 (MAV) at an MOI of 2 or mock infected  
915 (mock). Cells were collected at 25 hpi and lysed; cleared lysates were layered onto 10-50%  
916 sucrose gradients and centrifuged. Gradients were collected from the top and pumped through a  
917 UV spectrophotometer, and 34 fractions were collected. The gradients are displayed with the  
918 bottom fractions to the right. The UV trace of the first 10 fractions (including 40S and 60S  
919 ribosomal subunits) is not shown. (C) RNA was purified from each fraction of the gradients in B.  
920 cDNA was generated from the RNA, and qPCR was used to quantitate PKR mRNA in each  
921 fraction and displayed as the percent of total PKR mRNA associated with ribosomes. B and C  
922 are results from one representative experiment of 3 independent experiments. (D) Percentage of  
923 total PKR mRNA associated with monosomes (fractions 1-6) and polysomes (fractions 7-19)  
924 from the trial displayed in B and C were pooled for mock and infected samples. The percentages  
925 represented by each bar are displayed below each bar. (E) Pooled monosome and polysome data  
926 as described in D from three independent experiments. Error bars show the SEM. The

927 percentages represented by each bar are displayed below each bar. There were no significant  
928 differences between mock and infected samples (A, E).

929

930 **Figure 5.** PKR is not depleted by lysosomal degradation during MAV-1 infection. (A) CMT93  
931 cells were infected with MAV-1 (MAV) at an MOI of 10 or mock infected (mock) and treated  
932 with 10 mM ammonium chloride or 60  $\mu$ M chloroquine to inhibit lysosomal degradation, or  
933 water, as a control. Cell lysates were analyzed by immunoblot with antibodies for PKR (D-20)  
934 and actin. Blots are representative of three independent experiments. (B) Inhibitors were tested  
935 for activity using a DQ BSA assay; the DQ BSA molecule will only fluoresce if lysosomal  
936 degradation is functional. Uninfected cells were treated as indicated and imaged by fluorescence  
937 microscopy.

938

939 **Figure 6.** PKR is depleted by proteasomal degradation during MAV-1 infection. (A) C57BL/6  
940 MEFs were infected with MAV-1 (MAV) at an MOI of 10 or mock infected (mock) and treated  
941 with DMSO (vehicle for inhibitors), 1  $\mu$ M MG132, or 1  $\mu$ M bortezomib. Cell lysates were were  
942 analyzed by immunoblot with antibodies for PKR (D-20) and actin. Blots are representative of  
943 four independent experiments. (B) Densitometry quantitation of four independent experiments.  
944 Treatment with bortezomib significantly inhibited PKR depletion in MAV-1 infected cells,  $*P \leq$   
945 0.05.

946

947 **Figure 7.** PKR is actively depleted early in infection. (A) CMT93 cells were infected with  
948 MAV-1 (MAV) at an MOI of 10 or mock infected (mock) (top), or uninfected cells were treated  
949 with 50  $\mu$ g/mL cycloheximide (CHX, bottom) to inhibit elongation of protein synthesis. Cell

950 lysates were analyzed by immunoblot with antibodies for PKR (D-20) and actin. Blots are  
951 representative of five independent experiments. (B) Densitometry quantitation of five  
952 independent experiments,  $**P \leq 0.01$ . (C) CMT93 cell lysates from A were analyzed with a  
953 second immunoblot with antibodies for E1A and actin. Blots are representative of four replicates  
954 from two independent experiments. The E1A blot image was uniformly adjusted to a brightness  
955 of 30 and a contrast of 5 in Adobe Photoshop.

956

957 **Figure 8.** Early gene expression is required for PKR depletion by MAV-1. (A) Cells (as  
958 indicated at left) were infected with WT MAV-1 (WT MAV) or UV-inactivated MAV-1 (UV  
959 MAV) at an MOI of 10, or mock infected (mock). Cell lysates were analyzed by immunoblot  
960 with antibodies for PKR (D-20) and actin. Two independent wells were infected for each  
961 condition at both time points. (B) CMT93 cells were infected with WT MAV-1 (MAV) at an  
962 MOI of 10 or mock infected (mock). Infected cells were also treated (+) or not (-) with 20  $\mu\text{g}/\text{mL}$   
963 cytosine arabinasine (AraC), an inhibitor of DNA synthesis. Cell lysates were analyzed with  
964 antibodies for PKR and actin.

965

966

967 **Supplemental Figure Legends**

968 **Supplemental Figure 1.** PKR is depleted at MOIs of 2, 5, and 10. C57BL/6 MEFs were infected  
969 with MAV-1 at an MOI of 2, 5, or 10 (2, 5, 10) or mock infected (mock). Cell lysates were  
970 analyzed by immunoblot with antibodies for PKR (B-10) and actin. Densitometry quantitation  
971 using ImageJ is listed below each lane; for each time point, the infected samples were  
972 normalized to the mock. The PKR blot image was uniformly adjusted to a brightness of 150 in  
973 Adobe Photoshop.

974

975 **Supplemental Figure 2.** Ribosome pelleting. To confirm that most ribosomes ended up in the  
976 pellet after centrifugation through sucrose (Fig. 4A), a sample of the pellet and the corresponding  
977 supernatant were analyzed by immunoblot with antibodies for RPL7 (ribosomal protein L7,  
978 Abcam, 1:2000, ab72550).

979

980 **Supplemental Figure 3.** PKR mRNA 5' UTR does not result in altered reporter protein levels  
981 upon MAV-1 infection. (A) C57BL/6 MEFs or (B) CMT93 cells were co-transfected with  
982 pmPKR5UTRfullNL or AUG-NL-3xFLAG and pGL4.13 using jetPRIME reagents (Polyplus  
983 #114-15) using the standard Polyplus protocol, with 200 ng total of plasmid and 300  $\mu$ L of  
984 jetPRIME reagent per 35 mm well. At 24 hours after transfection, the cells were infected with  
985 MAV-1 at an MOI of 10. At 24 hpi, cells were lysed in 70  $\mu$ L/well Glo Lysis Buffer (Promega  
986 Corp.). After lysing, 25  $\mu$ L of each lysed sample and 25  $\mu$ L of OneGlo or NanoGlo (Promega  
987 Corp.) was added to two wells in a black 96-well plate (Fisher Scientific #07-000-634). After 5  
988 minutes, the plate was read on a Promega GloMax luminometer. Relative light units from the

989 pmPKR5UTRfullNL plasmid were normalized to the firefly luciferase and positive control  
990 plasmids. Graphs are representative of 7-9 biological replicates per treatment group.

991

992 **Supplemental Figure 4.** MG132 and bortezomib treatment do not affect MAV-1 replication at  
993 24 hpi. C57BL/6 MEFs were infected with MAV-1 at an MOI of 10 and treated with DMSO  
994 (vehicle for inhibitors), 1  $\mu$ M MG132 or bortezomib, and collected at 24 hpi. DNA was purified  
995 from cell pellets and analyzed for MAV-1 genome copies by qPCR. Graph is representative of  
996 five biological replicates per treatment group. Error bars are standard error of the mean (SEM).  
997 \* $P \leq 0.05$ .

998

999 **Supplemental Figure 5.** PKR is not detectably ubiquitinated during MAV-1 infection. CMT93  
1000 cells were transfected with a GFP-ubiquitin plasmid using standard Polyplus transfection  
1001 protocols. At 24 hpt, the cells were infected with MAV-1 (MAV) at an MOI of 5 or mock  
1002 infected (mock) and treated with 10  $\mu$ M MG132 at 6 hpi. Cell lysates were collected at 12 hpi  
1003 and immunoprecipitated with (A) PKR (D-20) or an isotype control antibody or (B) p53 (DO-1)  
1004 or an isotype control antibody. Immunoprecipitated samples were analyzed by immunoblot with  
1005 GFP, ubiquitin, isotype, PKR (B-10), or p53 (1801) antibodies. Input lane (mock input) contains  
1006 0.008 volume of mock infected lysate (relative to volume in immunoprecipitations). For (B) GFP  
1007 and p53 were probed on separate duplicate blots.

1008

1009 **Supplemental Figure 6.** Viral DNA replication can be detected at 24 hpi by qPCR. CMT93  
1010 cells were infected with MAV-1 (MAV) at an MOI of 10 and collected every 6 hours for 24  
1011 hours. DNA was purified from cell pellets and analyzed for MAV-1 genome copies by qPCR.

1012 Graph is representative of four to five biological replicates per treatment group. Error bars are  
1013 standard error of the mean (SEM).

1014

1015 **Supplemental Figure 7.** UV-inactivated virus does not replicate viral DNA. (A) C57BL/6 MEFs  
1016 or (B) CMT93 cells were infected with WT MAV-1 (WT) or UV-inactivated MAV-1 (UV) at an  
1017 MOI of 10 and collected at indicated times. DNA was purified from cell pellets and analyzed for  
1018 MAV-1 genome copies by qPCR. Graphs are representative of three to four biological replicates  
1019 per treatment group. Error bars are standard error of the mean (SEM).

1020

1021 **Supplemental Figure 8.** AraC treatment inhibited late protein expression. CMT93 cells were  
1022 infected with WT MAV-1 (MAV) at an MOI of 10 or mock infected (mock). Infected cells were  
1023 also treated (+) or not (-) with 20 µg/mL cytosine arabinasine (araC), an inhibitor of DNA  
1024 synthesis. Cell lysates were analyzed with antibodies for late virion proteins (AKO1-103,  
1025 1:1000). Arrowheads indicate late viral proteins.

1026



Figure 1.

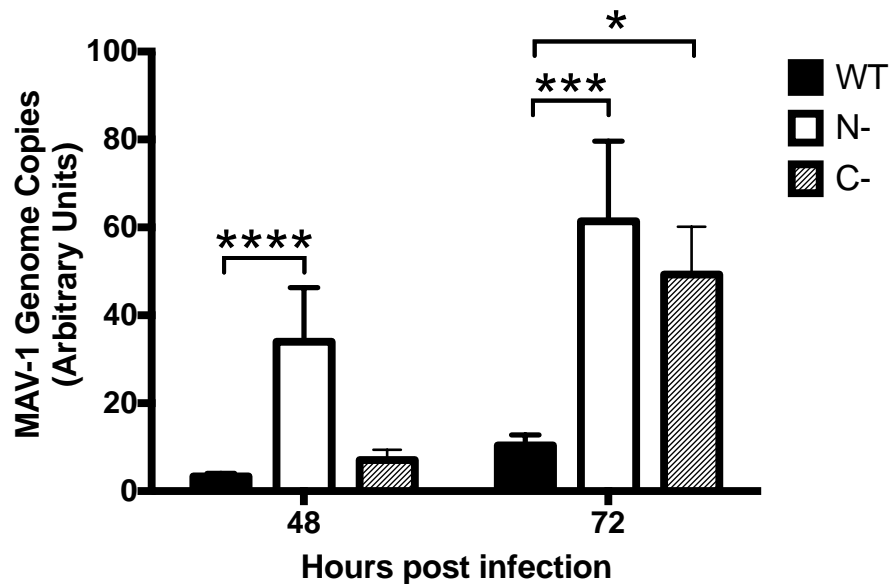

**Figure 1.** Viral DNA yield is increased in PKR<sup>-/-</sup> mouse embryonic fibroblasts. PKR WT MEFs (WT), N-PKR<sup>-/-</sup> MEFs (N-), and C-PKR<sup>-/-</sup> MEFs (C-) were infected with MAV-1 at an MOI 1 and collected at 48 and 72 hpi. DNA was purified from cell pellets and analyzed for MAV-1 genome copies by qPCR. Graph is representative of three experiments, 14 biological replicates per cell line per time point. Error bars are standard error of the mean (SEM). \* $P \leq 0.05$ , \*\*\* $P \leq 0.0002$ , \*\*\*\* $P \leq 0.0001$

Figure 2.

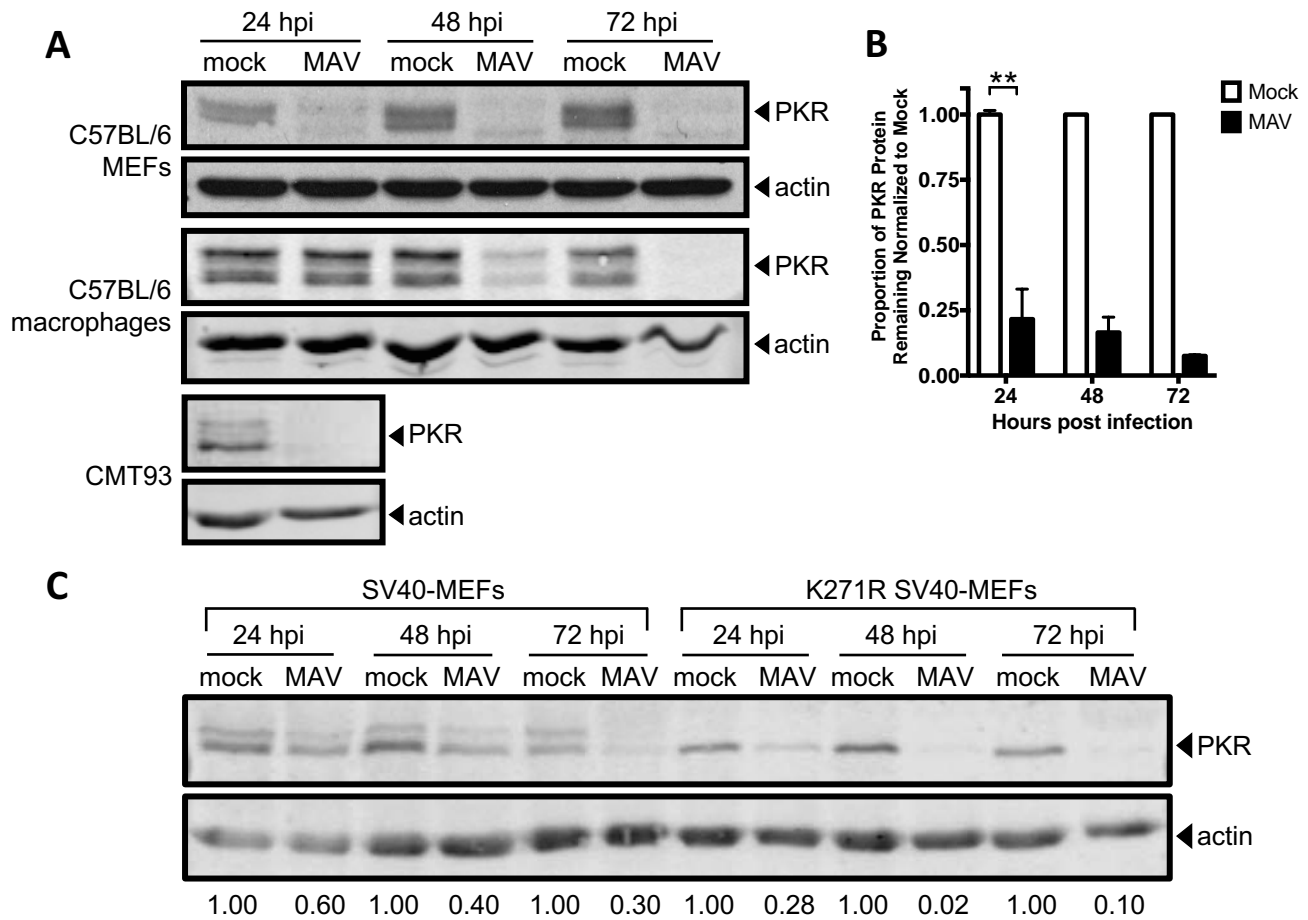

**Figure 2.** Mouse PKR is depleted during MAV-1 infection. (A) Cells (indicated at left) were infected with MAV-1 (MAV) at an MOI of 10 or mock infected (mock). Cell lysates were collected at the indicated times and analyzed by immunoblot with antibodies for PKR (B-10 for C57BL/6 MEFs and D-20 for C57BL/6 primary peritoneal macrophages and CMT93 cells) and actin. Blots are representative of a minimum of three independent experiments per cell line. (B) Densitometry quantitation of five C57BL/6 MEFs immunoblots from A. Error bars are SEM. N=5 for 24 hpi, n=4 for 48 hpi, and n=2 for 72 hpi.  $**P \leq 0.01$ . (C) SV40-MEFs or kinase-dead (K271R) SV40-MEFs were infected with MAV-1 at an MOI of 10. Cell lysates were immunoblotted as in A with PKR D-20. Numbers below are the proportion of PKR protein for each time point, normalized to actin and the mock PKR protein levels from the corresponding time point.

Figure 3.

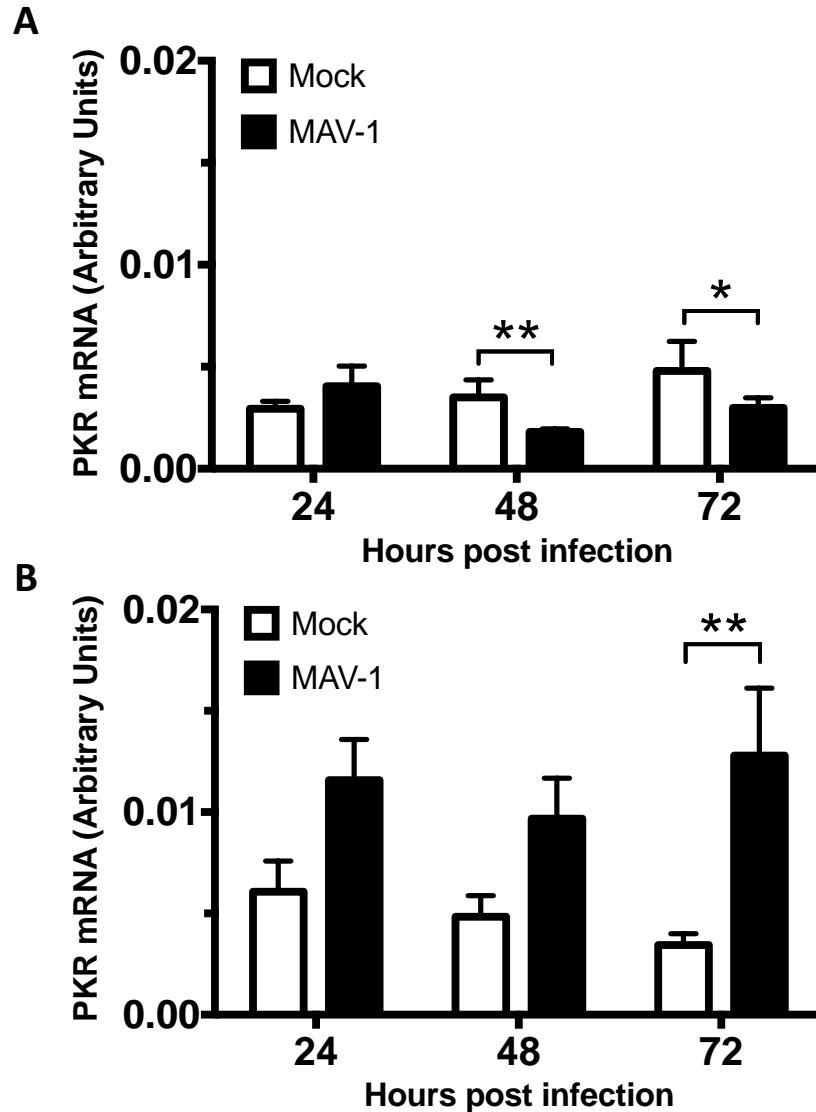

**Figure 3.** MAV-1 does not cause PKR depletion by reducing steady state levels of PKR mRNA at times when the protein levels are already reduced. MEFs (A) or isolated primary peritoneal macrophages (B) were harvested and infected with MAV-1 at an MOI of 10 or mock infected. The cell pellets were collected and RNA was isolated. cDNA was generated from the RNA, and qPCR was used to quantitate PKR mRNA levels. Each graph contains 5-7 replicates for each time point from three pooled experiments. Error bars show the SEM.  $*P \leq 0.05$  and  $**P \leq 0.01$ .

Figure 4.

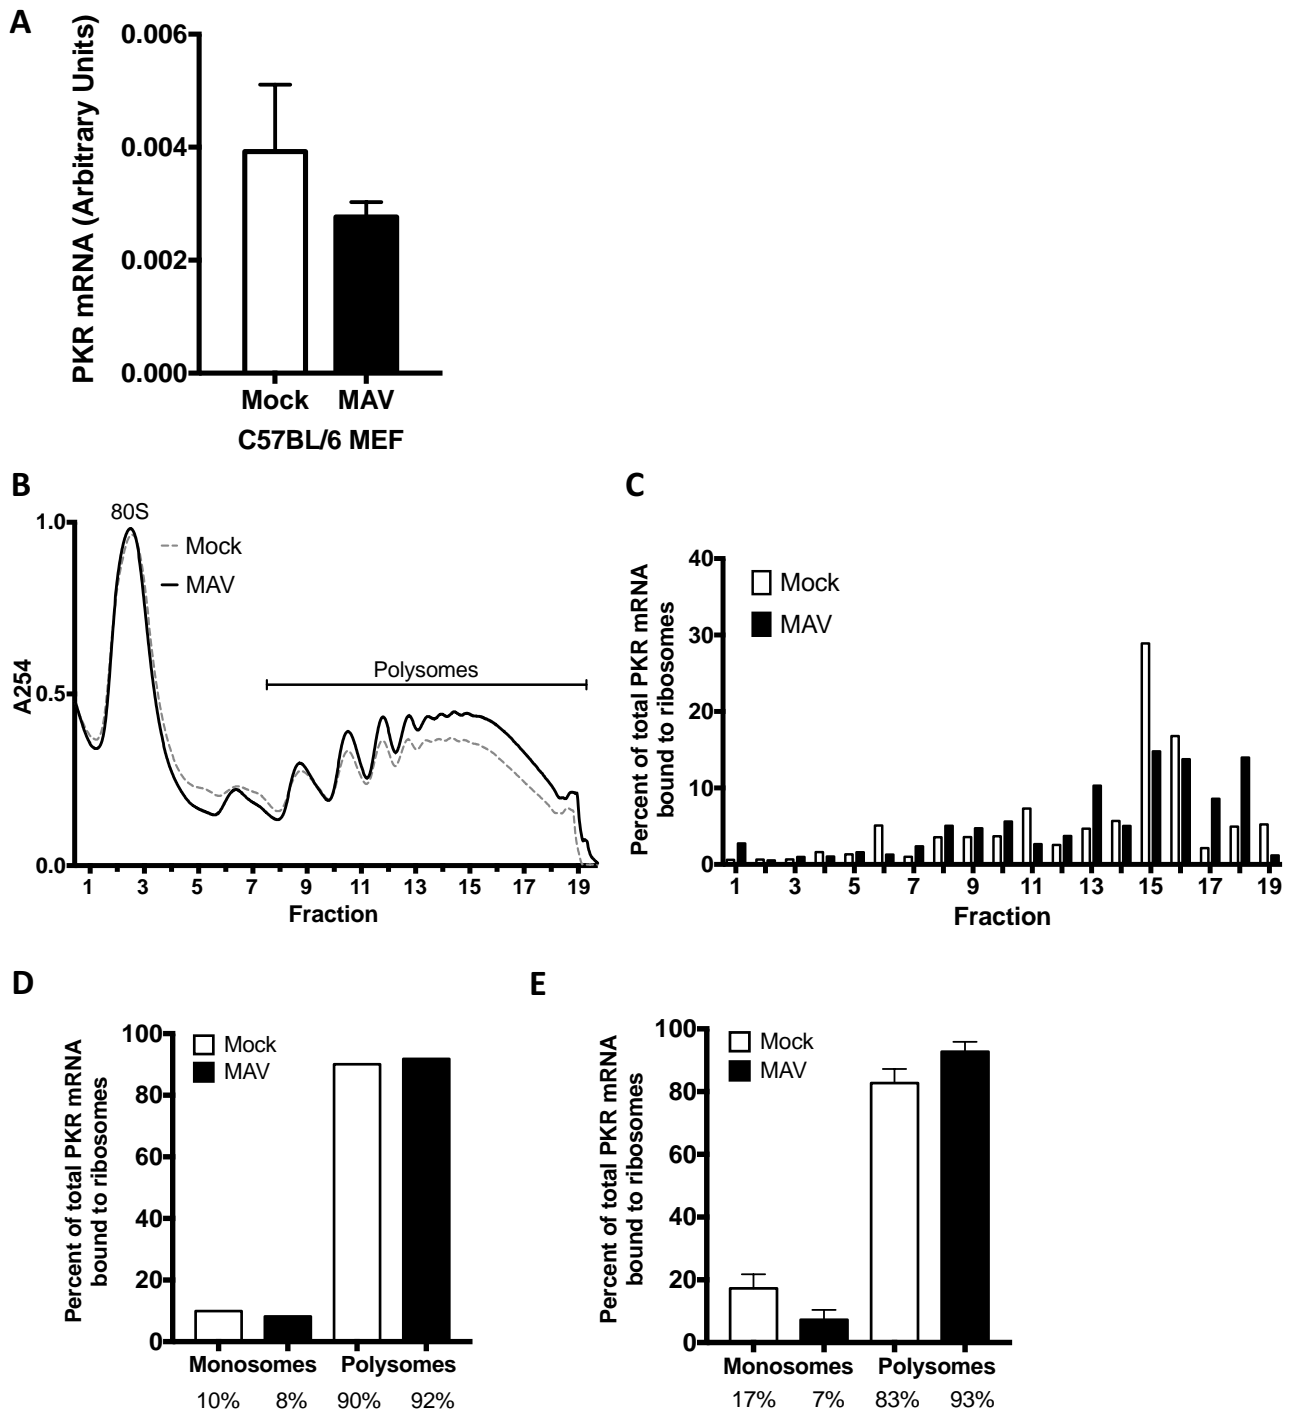

**Figure 4.** MAV-1 infection does not affect PKR translation. (A) C57BL/6 MEFs were infected with MAV-1 (MAV) at an MOI of 5 or mock infected (mock) and collected at 48 hpi. Cells were lysed, and cleared lysates from three 10 cm plates were layered onto 25% sucrose and centrifuged to pellet ribosomes. RNA was purified from the pellets, cDNA was generated from the RNA, and qPCR was used to quantitate the PKR mRNA levels. The graph contains 9 replicates for each time point, pooled from 3 independent experiments. Error bars show the SEM. (B) C57BL/6 MEFs were infected with MAV-1 (MAV) at an MOI of 2 or mock infected (mock). Cells were collected at 25 hpi and lysed; cleared lysates were layered onto 10-50% sucrose gradients and centrifuged. Gradients were collected from the top and pumped through a UV spectrophotometer, and 34 fractions were collected. The gradients are displayed with the bottom fractions to the right. The UV trace of the first 10 fractions (including 40S and 60S ribosomal subunits) is not shown. (C) RNA was purified from each fraction of the gradients in B. cDNA was generated from the RNA, and qPCR was used to quantitate PKR mRNA in each fraction and displayed as the percent of total PKR mRNA associated with ribosomes. B and C are results from one representative experiment of 3 independent experiments. (D) Percentage of total PKR mRNA associated with monosomes (fractions 1-6) and polysomes (fractions 7-19) from the trial displayed in B and C were pooled for mock and infected samples. The percentages represented by each bar are displayed below each bar. (E) Pooled monosome and polysome data as described in D from three independent experiments. Error bars show the SEM. The percentages represented by each bar are displayed below each bar. There were no significant differences between mock and infected samples (A, E).

## Figure 5.

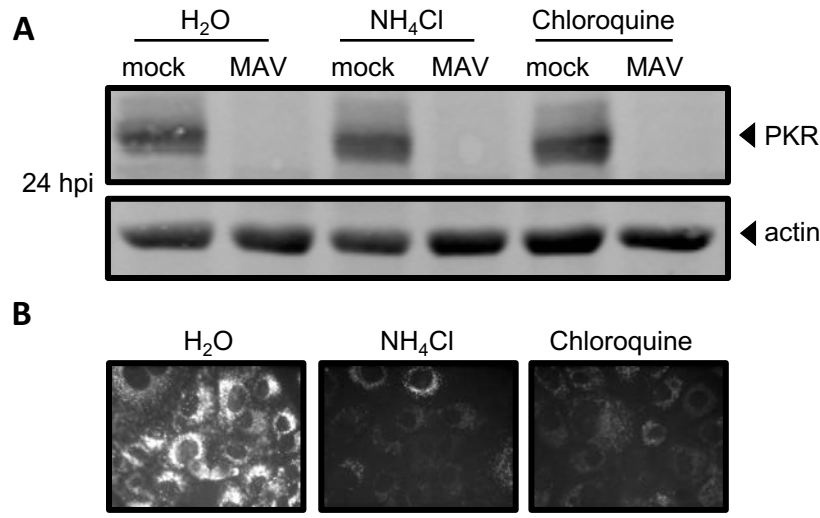

**Figure 5.** PKR is not depleted by lysosomal degradation during MAV-1 infection. (A) CMT93 cells were infected with MAV-1 (MAV) at an MOI of 10 or mock infected (mock) and treated with 10 mM ammonium chloride or 60  $\mu$ M chloroquine to inhibit lysosomal degradation, or water, as a control. Cell lysates were analyzed by immunoblot with antibodies for PKR (D-20) and actin. Blots are representative of three independent experiments. (B) Inhibitors were tested for activity using a DQ BSA assay; the DQ BSA molecule will only fluoresce if lysosomal degradation is functional. Uninfected cells were treated as indicated and imaged by fluorescence microscopy.

## Figure 6.

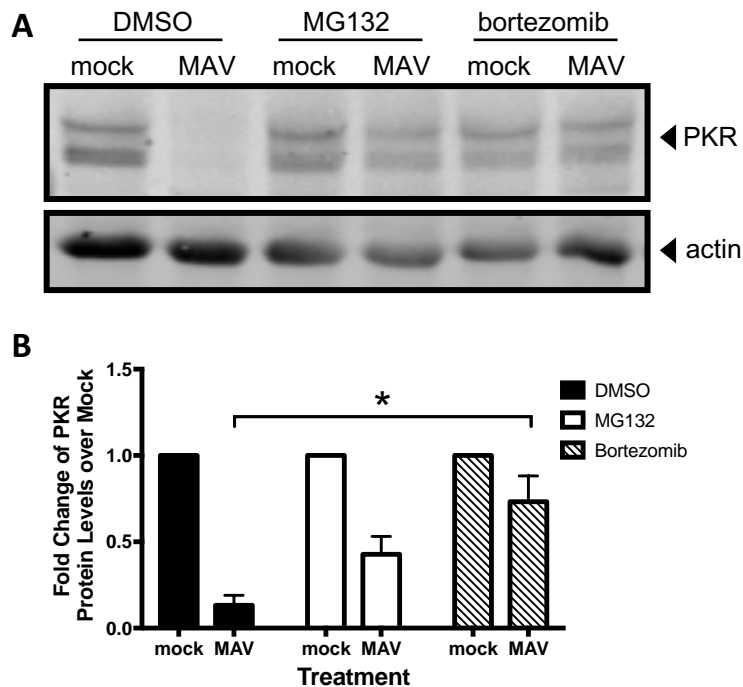

**Figure 6.** PKR is depleted by proteasomal degradation during MAV-1 infection. (A) C57BL/6 MEFs were infected with MAV-1 (MAV) at an MOI of 10 or mock infected (mock) and treated with DMSO (vehicle for inhibitors), 1  $\mu$ M MG132, or 1  $\mu$ M bortezomib. Cell lysates were analyzed by immunoblot with antibodies for PKR (D-20) and actin. Blots are representative of four independent experiments. (B) Densitometry quantitation of four independent experiments. Treatment with bortezomib significantly inhibited PKR depletion in MAV-1 infected cells,  $*P \leq 0.05$ .

## Figure 7.

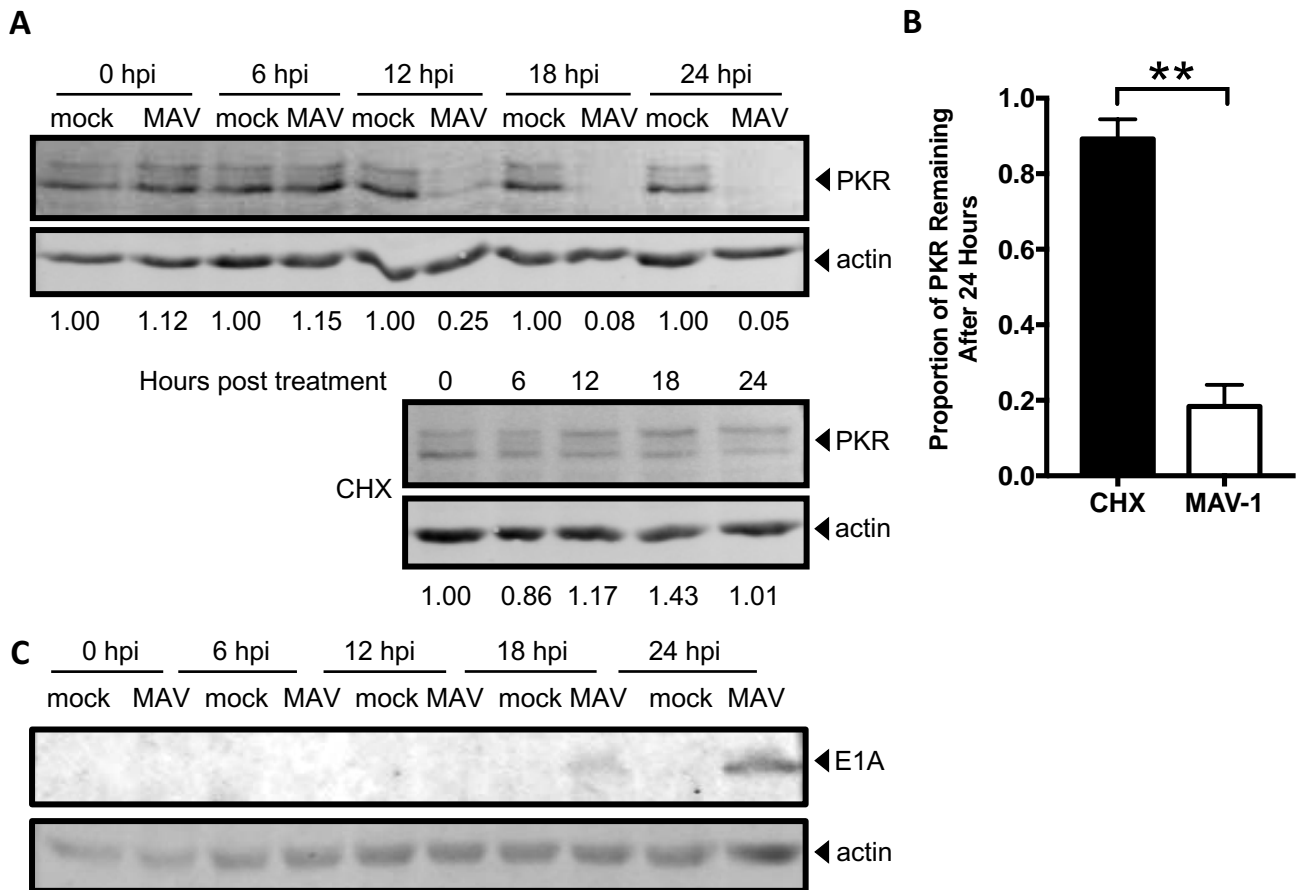

**Figure 7.** PKR is actively depleted early in infection. (A) CMT93 cells were infected with MAV-1 (MAV) at an MOI of 10 or mock infected (mock) (top), or uninfected cells were treated with 50  $\mu\text{g/mL}$  cycloheximide (CHX, bottom) to inhibit elongation of protein synthesis. Cell lysates were analyzed by immunoblot with antibodies for PKR (D-20) and actin. Blots are representative of five independent experiments. (B) Densitometry quantitation of five independent experiments,  $**P \leq 0.01$ . (C) CMT93 cell lysates from A were analyzed with a second immunoblot with antibodies for E1A and actin. Blots are representative of four replicates from two independent experiments. The E1A blot image was uniformly adjusted to a brightness of 30 and a contrast of 5 in Adobe Photoshop.



## Figure 8.

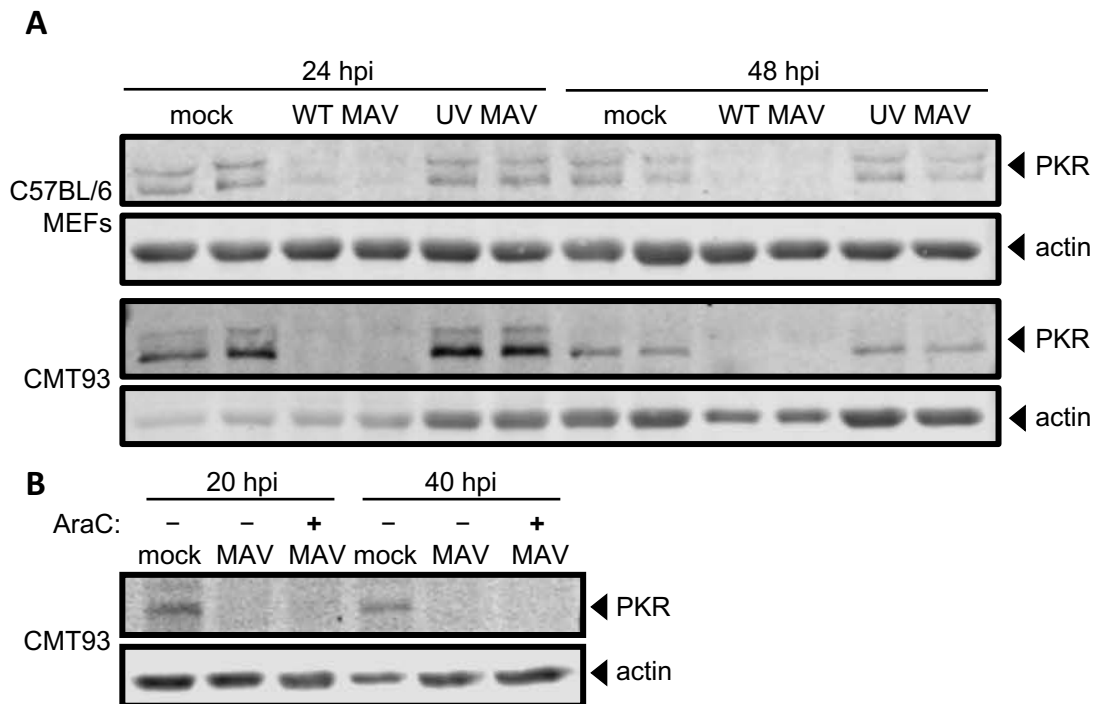

**Figure 8.** Early gene expression is required for PKR depletion by MAV-1. (A) Cells (as indicated at left) were infected with WT MAV-1 (WT MAV) or UV-inactivated MAV-1 (UV MAV) at an MOI of 10, or mock infected (mock). Cell lysates were analyzed by immunoblot with antibodies for PKR (D-20) and actin. Two independent wells were infected for each condition at both time points. (B) CMT93 cells were infected with WT MAV-1 (MAV) at an MOI of 10 or mock infected (mock). Infected cells were also treated (+) or not (-) with 20  $\mu$ g/mL cytosine arabinasine (AraC), an inhibitor of DNA synthesis. Cell lysates were analyzed with antibodies for PKR and actin.

# Supplemental Data Pieces

## Supplemental Figure 1.

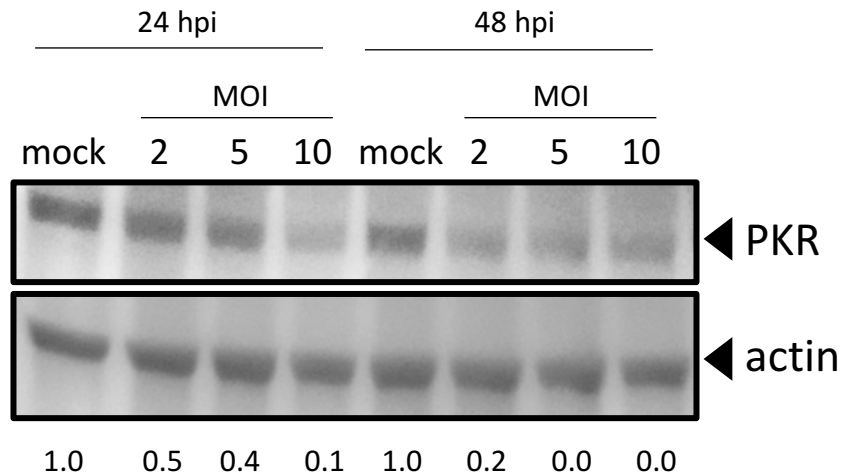

**Supplemental Figure 1.** PKR is depleted at MOIs of 2, 5, and 10. C57BL/6 MEFs were infected with MAV-1 at an MOI of 2, 5, or 10 (2, 5, 10) or mock infected (mock). Cell lysates were analyzed by immunoblot with antibodies for PKR (B-10) and actin. Densitometry quantitation using ImageJ is listed below each lane; for each time point, the infected samples were normalized to the mock. The PKR blot image was uniformly adjusted to a brightness of 150 in Adobe Photoshop.

## Supplemental Figure 2.

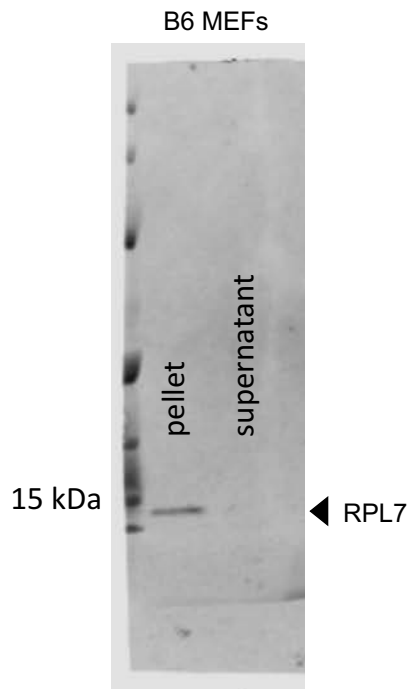

**Supplemental Figure 2.** Ribosome pelleting. To confirm that most ribosomes ended up in the pellet after centrifugation through sucrose (Fig. 4A), a sample of the pellet and the corresponding supernatant were analyzed by immunoblot with antibodies for RPL7 (ribosomal protein L7, Abcam, 1:2000, ab72550).

Supplemental Figure 3.

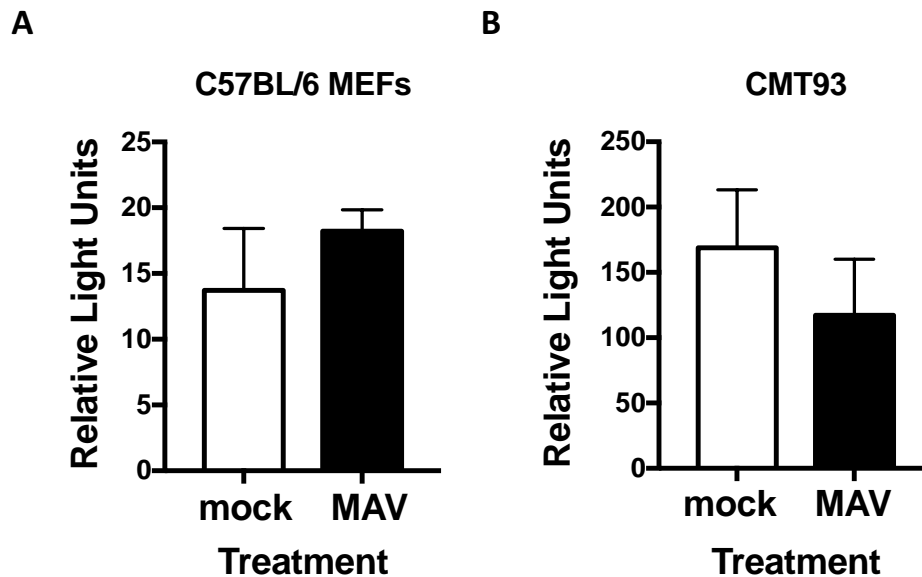

**Supplemental Figure 3.** PKR mRNA 5' UTR does not result in altered reporter protein levels upon MAV-1 infection. (A) C57BL/6 MEFs or (B) CMT93 cells were co-transfected with pmPKR5UTRfullNL or AUG-NL-3xFLAG and pGL4.13 using jetPRIME reagents (Polyplus #114-15) using the standard Polyplus protocol, with 200 ng total of plasmid and 300  $\mu$ L of jetPRIME reagent per 35 mm well. At 24 hours after transfection, the cells were infected with MAV-1 at an MOI of 10. At 24 hpi, cells were lysed in 70  $\mu$ L/well Glo Lysis Buffer (Promega Corp.). After lysing, 25  $\mu$ L of each lysed sample and 25  $\mu$ L of OneGlo or NanoGlo (Promega Corp.) was added to two wells in a black 96-well plate (Fisher Scientific #07-000-634). After 5 minutes, the plate was read on a Promega GloMax luminometer. Relative light units from the pmPKR5UTRfullNL plasmid were normalized to the firefly luciferase and positive control plasmids. Graphs are representative of 7-9 biological replicates per treatment group.

## Supplemental Figure 4.

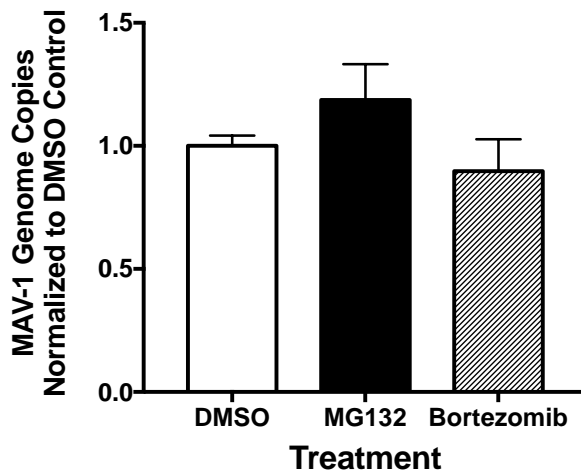

**Supplemental Figure 4.** MG132 and bortezomib treatment do not affect MAV-1 replication at 24 hpi. C57BL/6 MEFs were infected with MAV-1 at an MOI of 10 and treated with DMSO (vehicle for inhibitors), 1  $\mu$ M MG132 or bortezomib, and collected at 24 hpi. DNA was purified from cell pellets and analyzed for MAV-1 genome copies by qPCR. Graph is representative of five biological replicates per treatment group. Error bars are standard error of the mean (SEM). \* $P \leq 0.05$

## Supplemental Figure 5.

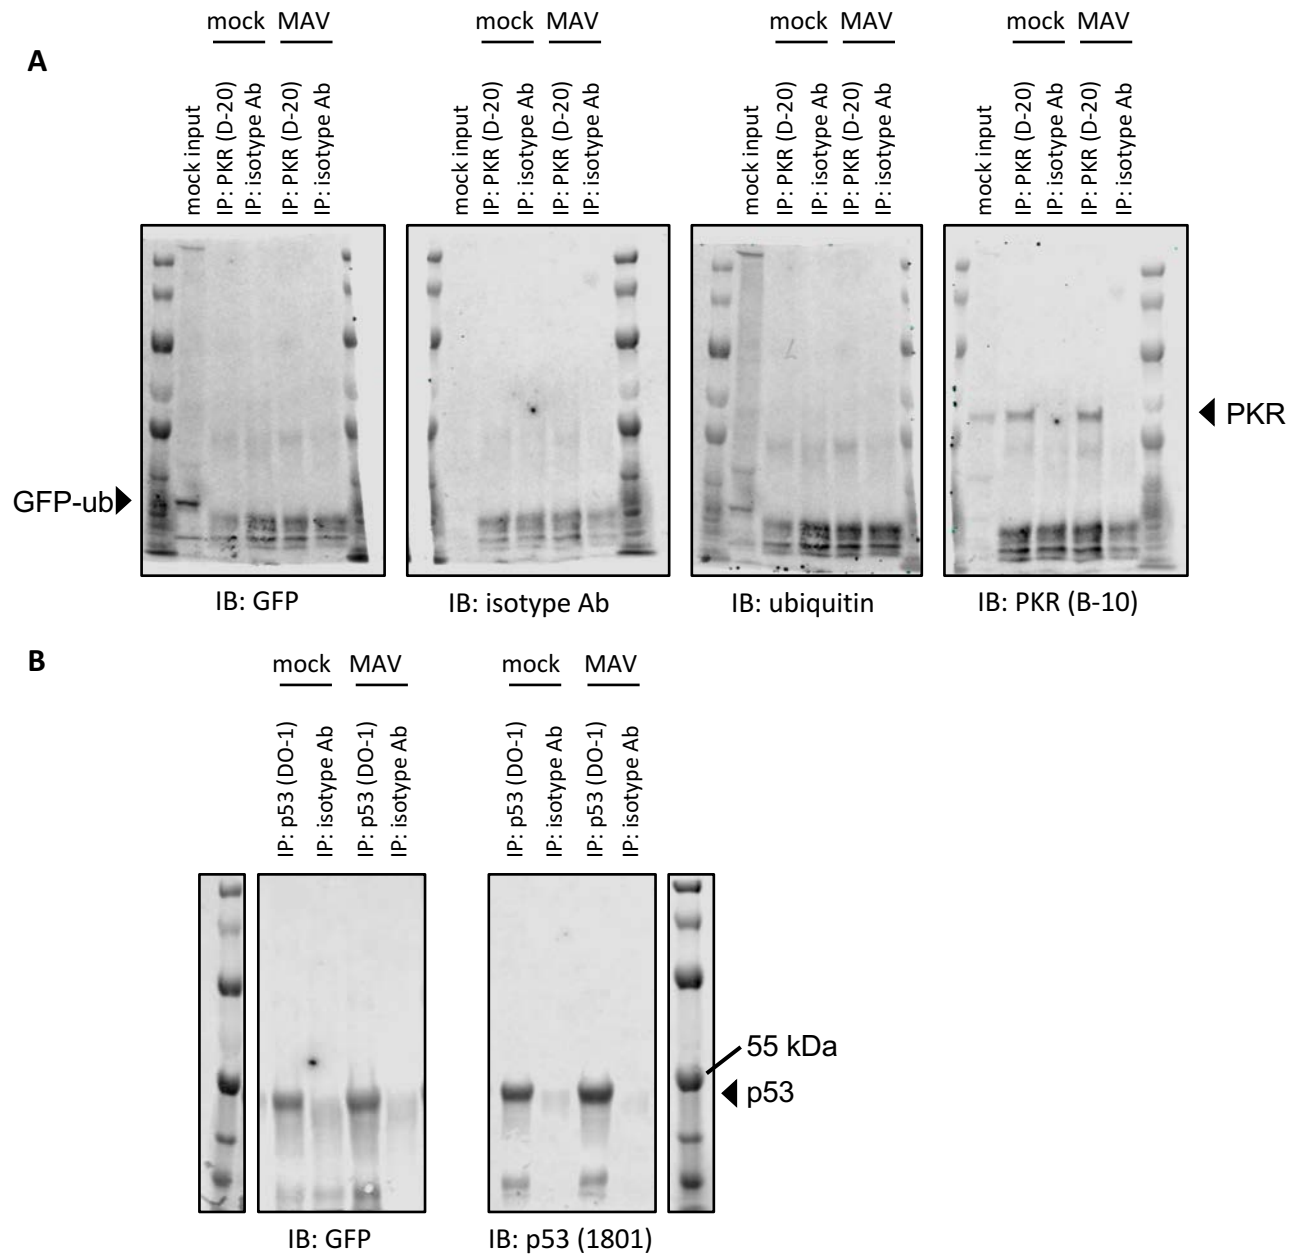

**Supplemental Figure 5.** PKR is not detectably ubiquitinated during MAV-1 infection. CMT93 cells were transfected with a GFP-ubiquitin plasmid using standard Polyplus transfection protocols. At 24 hpi, the cells were infected with MAV-1 (MAV) at an MOI of 5 or mock infected (mock) and treated with 10  $\mu$ M MG132 at 6 hpi. Cell lysates were collected at 12 hpi and immunoprecipitated with (A) PKR (D-20) or an isotype control antibody or (B) p53 (DO-1) or an isotype control antibody. Immunoprecipitated samples were analyzed by immunoblot with GFP, ubiquitin, isotype, PKR (B-10), or p53 (1801) antibodies. Input lane (mock input) contains 0.008 volume of mock infected lysate (relative to volume in immunoprecipitations). For (B) GFP and p53 were probed on separate duplicate blots.

## Supplemental Figure 6.

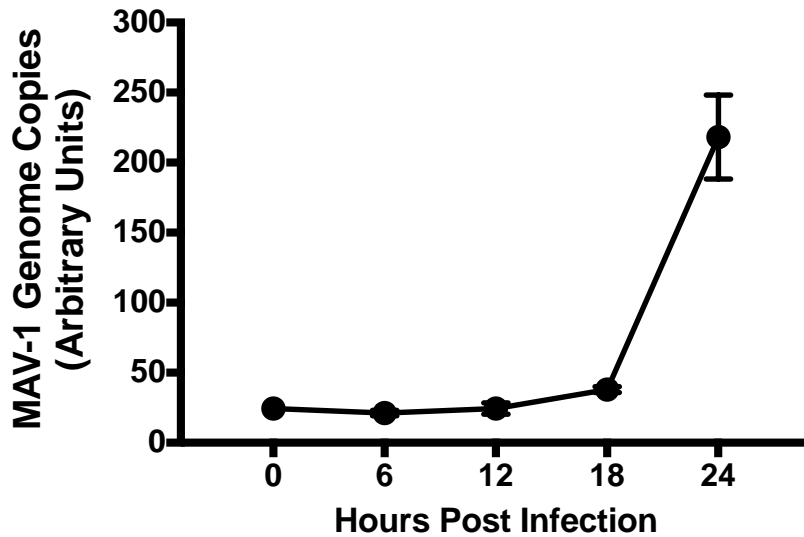

**Supplemental Figure 6.** Viral DNA replication can be detected at 24 hpi by qPCR. CMT93 cells were infected with MAV-1 (MAV) at an MOI of 10 and collected every 6 hours for 24 hours. DNA was purified from cell pellets and analyzed for MAV-1 genome copies by qPCR. Graph is representative of four to five biological replicates per treatment group. Error bars are standard error of the mean (SEM).



## Supplemental Figure 7.

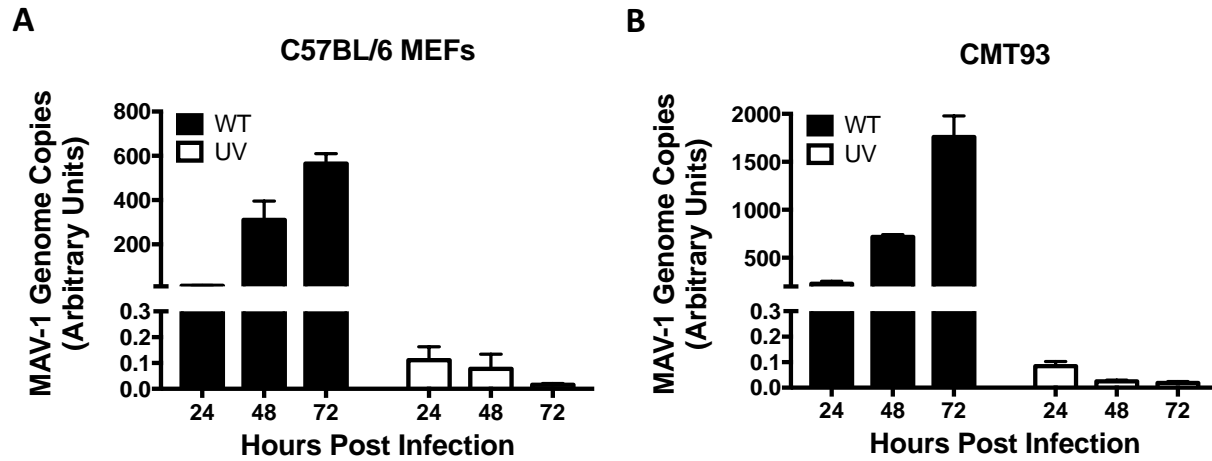

**Supplemental Figure 7.** UV-inactivated virus does not replicate viral DNA. (A) C57BL/6 MEFs or (B) CMT93 cells were infected with WT MAV-1 (WT) or UV-inactivated MAV-1 (UV) at an MOI of 10 and collected at indicated times. DNA was purified from cell pellets and analyzed for MAV-1 genome copies by qPCR. Graphs are representative of three to four biological replicates per treatment group. Error bars are standard error of the mean (SEM).

## Supplemental Figure 8.

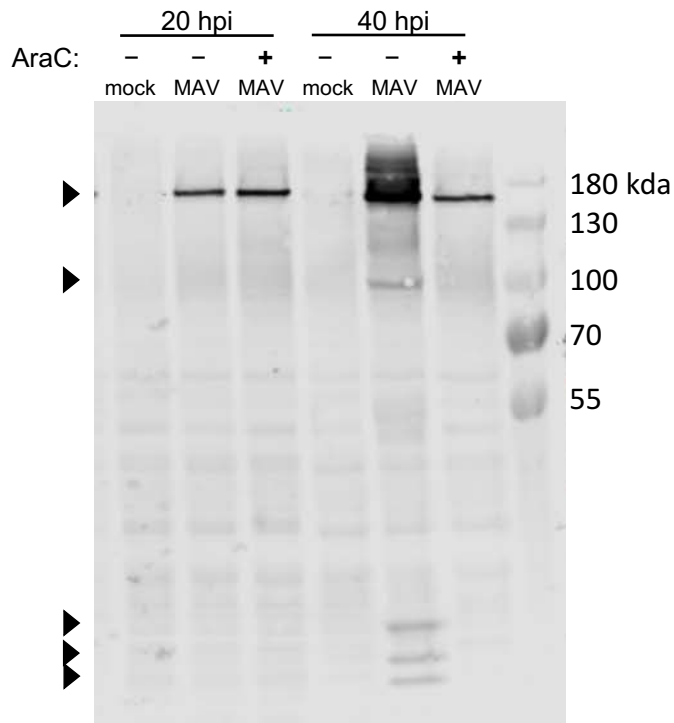

**Supplemental Figure 8.** AraC treatment inhibited late protein expression. CMT93 cells were infected with WT MAV-1 (MAV) at an MOI of 10 or mock infected (mock). Infected cells were also treated (+) or not (-) with 20  $\mu$ g/mL cytosine arabinosine (araC), an inhibitor of DNA synthesis. Cell lysates were analyzed with antibodies for late virion proteins (AKO1-103, 1:1000). Arrowheads indicate late viral proteins.
